# Supplementary material for: Silver(i) coordination polymers of trans-5-styrylpyrimidine – from structural diversity to solid-state reactivity under sunlight
Source: Royal Society of Chemistry journal article supplement (doi:10.1039/d3ce00756a), 2023-01-01
Supplement: d3ce00756a1.pdf [file d3ce00756a1.pdf]

## Supporting Information

### **Silver(I) coordination polymers of *trans*-5-styryl pyrimidine – from structural diversity to solid-state reactivity under sunlight**

**K. Mohamed Yusuf Baig<sup>a</sup> and Goutam Kumar Kole<sup>\*,a</sup>**

**Department of Chemistry, College of Engineering and Technology, SRM Institute of Science and Technology, Kattankulathur, Tamil Nadu 603203, India.**

**Email: [goutamks@srmist.edu.in](mailto:goutamks@srmist.edu.in)**

#### Table of Contents

| S. No. | Content                                     | Page No. |
|--------|---------------------------------------------|----------|
| 1.     | Crystallographic data                       | 2        |
| 2.     | Additional figures                          | 4        |
| 3.     | NMR Spectra                                 | 10       |
| 4.     | FT-IR Spectra                               | 16       |
| 5.     | UV-Vis absorption spectrum of <b>5-Spym</b> | 19       |
| 6.     | Hirshfeld surface analyses                  | 19       |

## 1. Crystallographic data

Table S1. Crystallographic data for 5-Spym and **1** – **2**.

| Compound                                                             | 5-Spym                                         | 1                                                               | 2                                                                  |
|----------------------------------------------------------------------|------------------------------------------------|-----------------------------------------------------------------|--------------------------------------------------------------------|
| CCDC No.                                                             | 2271976                                        | 2271977                                                         | 2271978                                                            |
| Formula                                                              | C <sub>12</sub> H <sub>10</sub> N <sub>2</sub> | C <sub>12</sub> H <sub>12</sub> AgN <sub>3</sub> O <sub>4</sub> | C <sub>12</sub> H <sub>12</sub> AgBF <sub>4</sub> N <sub>2</sub> O |
| Formula weight<br>(g.mol <sup>-1</sup> )                             | 182.22                                         | 370.12                                                          | 394.92                                                             |
| Temperature (K)                                                      | 295(2)                                         | 295(2)                                                          | 295(2)                                                             |
| Radiation, λ (Å)                                                     | Mo Kα (λ =0.71073)                             | Mo Kα (λ =0.71073)                                              | Mo Kα (0.71073)                                                    |
| Crystal Colour, habit                                                | Colorless, Block                               | Colorless, Block                                                | Colorless, Block                                                   |
| Crystal size (mm <sup>3</sup> )                                      | 0.330 x 0.270 x 0.240                          | 0.192 x 0.138 x 0.118                                           | 0.270 x 0.160 x 0.110                                              |
| Crystal system                                                       | Monoclinic                                     | Monoclinic                                                      | Monoclinic                                                         |
| Space Group                                                          | <i>P</i> 2 <sub>1</sub> / <i>c</i>             | <i>P</i> 2 <sub>1</sub> / <i>n</i>                              | <i>P</i> 2 <sub>1</sub> / <i>n</i>                                 |
| Unit cell dimensions                                                 |                                                |                                                                 |                                                                    |
| <i>a</i> (Å)                                                         | 22.3235(11)                                    | 7.799(2)                                                        | 7.7806(15)                                                         |
| <i>b</i> (Å)                                                         | 11.7383(5)                                     | 18.295(4)                                                       | 18.880(5)                                                          |
| <i>c</i> (Å)                                                         | 7.5580(4)                                      | 8.984(2)                                                        | 9.480(3)                                                           |
| <i>α</i> (°)                                                         | 90                                             | 90                                                              | 90                                                                 |
| <i>β</i> (°)                                                         | 92.989(2)                                      | 93.931(14)                                                      | 96.150(14)                                                         |
| <i>γ</i> (°)                                                         | 90                                             | 90                                                              | 90                                                                 |
| Volume (Å <sup>3</sup> )                                             | 1977.80(17)                                    | 1278.9(5)                                                       | 1384.6(6)                                                          |
| <i>Z</i>                                                             | 8                                              | 4                                                               | 4                                                                  |
| Calculated density<br>(Mg.m <sup>-3</sup> )                          | 1.224                                          | 1.922                                                           | 1.894                                                              |
| μ (mm <sup>-1</sup> )                                                | 0.074                                          | 1.593                                                           | 1.499                                                              |
| θ range (°)                                                          | 2.74 to 27.11                                  | 2.531 to 26.371                                                 | 2.157 to 26.368                                                    |
| Reflections collected                                                | 24051                                          | 15273                                                           | 27457                                                              |
| Independent reflections                                              | 4041                                           | 2606                                                            | 2835                                                               |
| Parameters/ restraints                                               | 254/0                                          | 188/0                                                           | 198/3                                                              |
| GooF on F <sup>2</sup>                                               | 1.064                                          | 1.098                                                           | 1.060                                                              |
| R <sub>1</sub> [ <i>I</i> >2σ( <i>I</i> )] <sup>a</sup>              | 0.0433(3298)                                   | 0.0254(2418)                                                    | 0.033(2493)                                                        |
| wR <sub>2</sub> (all data) <sup>b</sup>                              | 0.1273(4041)                                   | 0.0660(2606)                                                    | 0.0958(2835)                                                       |
| Maximum/minimum<br>residual electron density<br>(e.Å <sup>-3</sup> ) | 0.143/-0.129                                   | 0.383/-0.377                                                    | 0.764/-0.512                                                       |

Table S2. Crystallographic data for **3** – **5**.

| <b>Compound</b>                                                      | <b>3</b>                                                           | <b>4</b>                                                                         | <b>5</b>                                                                       |
|----------------------------------------------------------------------|--------------------------------------------------------------------|----------------------------------------------------------------------------------|--------------------------------------------------------------------------------|
| CCDC No.                                                             | 2271981                                                            | 2271979                                                                          | 2271980                                                                        |
| Formula                                                              | C <sub>12</sub> H <sub>10</sub> AgF <sub>6</sub> N <sub>2</sub> Sb | C <sub>13</sub> H <sub>10</sub> AgF <sub>3</sub> N <sub>2</sub> O <sub>3</sub> S | C <sub>14</sub> H <sub>10</sub> AgF <sub>3</sub> N <sub>2</sub> O <sub>2</sub> |
| Formula weight<br>(g.mol <sup>-1</sup> )                             | 525.85                                                             | 439.16                                                                           | 403.11                                                                         |
| Temperature (K)                                                      | 295(2)                                                             | 295(2)                                                                           | 295(2)                                                                         |
| Radiation, λ (Å)                                                     | Mo Kα (0.71073)                                                    | Mo Kα (0.71073)                                                                  | Mo Kα (0.71073)                                                                |
| Crystal Colour, habit                                                | Colorless, Needle                                                  | Colorless, Block                                                                 | Colorless, Block                                                               |
| Crystal size (mm <sup>3</sup> )                                      | 0.240 x 0.083 x 0.072                                              | 0.290 x 0.200 x 0.140                                                            | 0.180 x 0.150 x 0.120                                                          |
| Crystal system                                                       | Orthorhombic                                                       | Monoclinic                                                                       | Monoclinic                                                                     |
| Space Group                                                          | <i>Pnma</i>                                                        | <i>P2<sub>1</sub>/c</i>                                                          | <i>C2/c</i>                                                                    |
| Unit cell dimensions                                                 |                                                                    |                                                                                  |                                                                                |
| <i>a</i> (Å)                                                         | 12.102(4)                                                          | 6.6106(9)                                                                        | 36.304(10)                                                                     |
| <i>b</i> (Å)                                                         | 6.6333(11)                                                         | 17.709(2)                                                                        | 5.3887(9)                                                                      |
| <i>c</i> (Å)                                                         | 17.915(4)                                                          | 12.3217(17)                                                                      | 15.575(4)                                                                      |
| <i>α</i> (°)                                                         | 90                                                                 | 90                                                                               | 90                                                                             |
| <i>β</i> (°)                                                         | 90                                                                 | 94.626(4)                                                                        | 110.695(16)                                                                    |
| <i>γ</i> (°)                                                         | 90                                                                 | 90                                                                               | 90                                                                             |
| Volume (Å <sup>3</sup> )                                             | 1438.2(6)                                                          | 1437.8(3)                                                                        | 2850.4(12)                                                                     |
| <i>Z</i>                                                             | 4                                                                  | 4                                                                                | 8                                                                              |
| Calculated density<br>(Mg.m <sup>-3</sup> )                          | 2.429                                                              | 2.029                                                                            | 1.879                                                                          |
| μ (mm <sup>-1</sup> )                                                | 3.302                                                              | 1.597                                                                            | 1.455                                                                          |
| θ range (°)                                                          | 2.031 to 26.370                                                    | 2.018 to 26.370                                                                  | 2.624 to 26.371                                                                |
| Reflections collected                                                | 23119                                                              | 26235                                                                            | 17957                                                                          |
| Independent reflections                                              | 1603                                                               | 2938                                                                             | 2911                                                                           |
| Parameters/ restraints                                               | 185/197                                                            | 264/120                                                                          | 247/120                                                                        |
| GooF on F <sup>2</sup>                                               | 1.123                                                              | 1.106                                                                            | 1.056                                                                          |
| R <sub>1</sub> [ <i>I</i> >2σ( <i>I</i> )] <sup>a</sup>              | 0.0197(1499)                                                       | 0.0303(2657)                                                                     | 0.0262(2670)                                                                   |
| wR <sub>2</sub> (all data) <sup>b</sup>                              | 0.0509(1603)                                                       | 0.0742(2938)                                                                     | 0.0686(2911)                                                                   |
| Maximum/minimum<br>residual electron density<br>(e.Å <sup>-3</sup> ) | 0.378/-0.685                                                       | 0.493/- 0.451                                                                    | 0.452/-0.800                                                                   |

## 2. Additional crystallographic diagrams

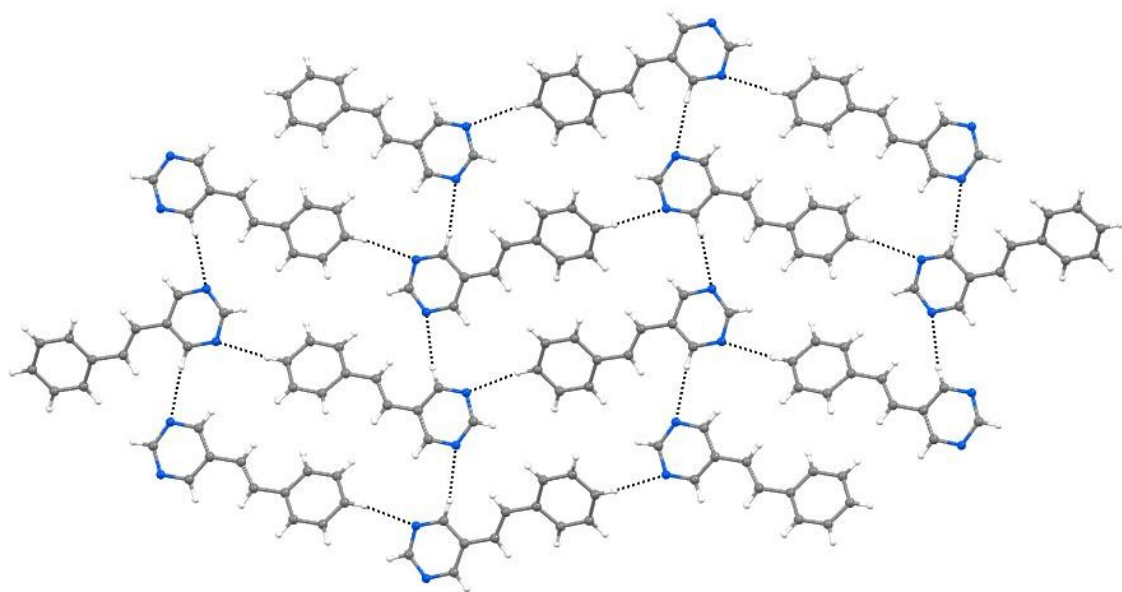

Fig. S1: Crystal packing of 5-Spym showing C-H...N weak interactions, viewed approximately along *c*-direction.

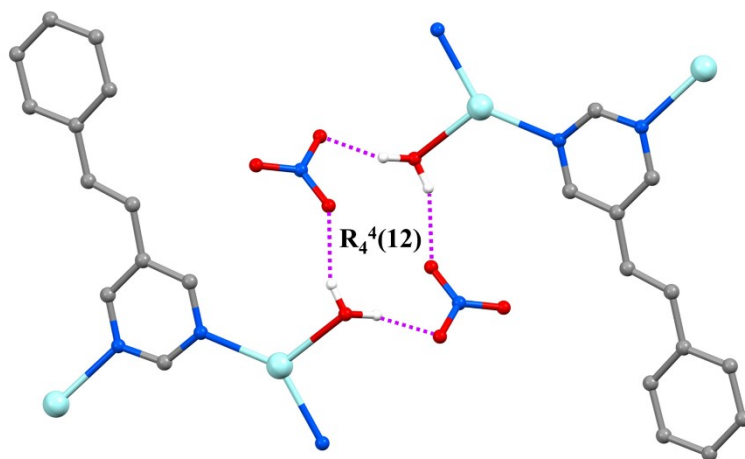

Fig. S2. Hydrogen bonding interaction between nitrate anion and aqua ligands from neighbouring chains and the formation of 12-membered ring of graph set  $R_4^4(12)$  in **1**.

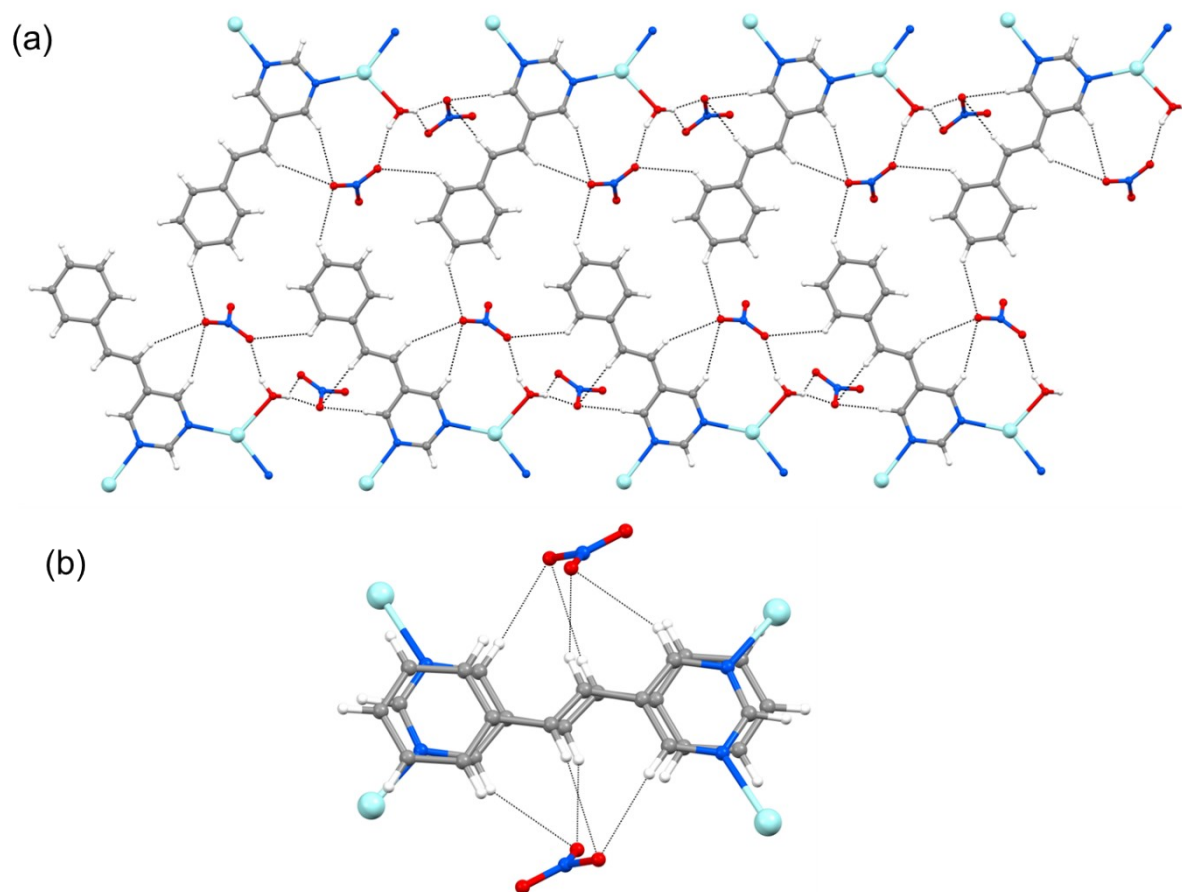

Fig. S3: (a) O–H···O hydrogen bonding and weak C–H···O interaction played by the nitrate anion, and (b) C–H···O weak interaction of nitrate anion with two stacked 5-Spym ligands from different polymeric chains.

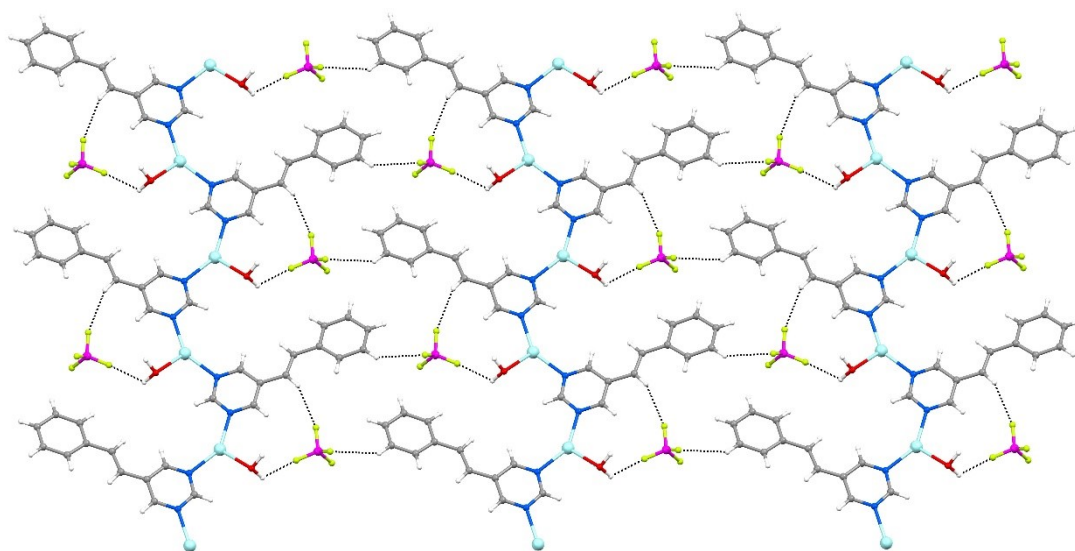

Fig. S4: (a) O–H···F hydrogen bonding and weak C–H···F interaction played by  $\text{BF}_4^-$  anion in **2**, viewed along  $a$ -direction.

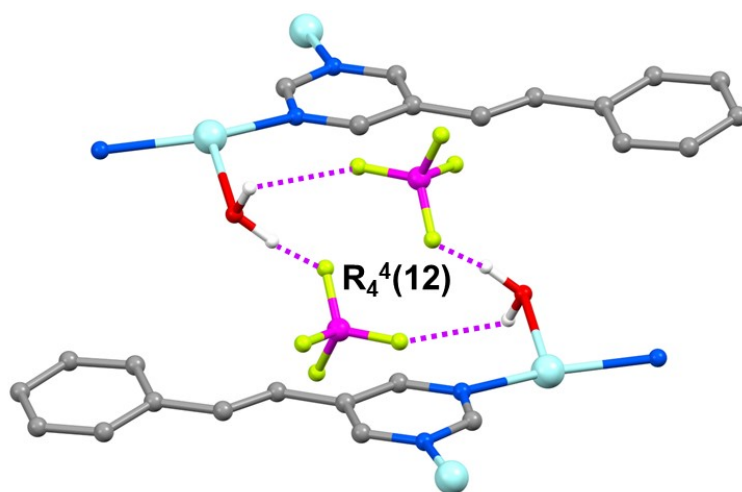

Fig. S5: Hydrogen bonding interaction between  $\text{BF}_4^-$  anion and aqua ligands from neighbouring chains and the formation of 12-membered ring of graph set  $\mathbf{R}_4^4(12)$  in **2**.

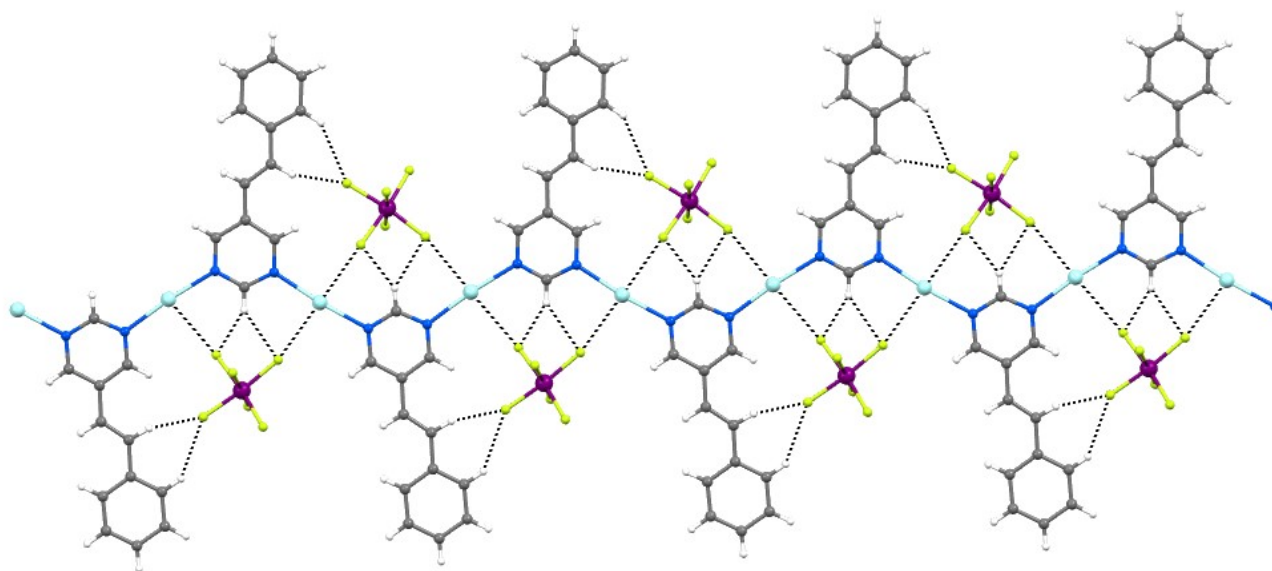

Fig. S6:  $\text{C-H}\cdots\text{F}$  and  $\text{Ag}\cdots\text{F}$  weak interaction played by  $\text{SbF}_6^-$  anion in **3**, viewed along  $a$ -direction.

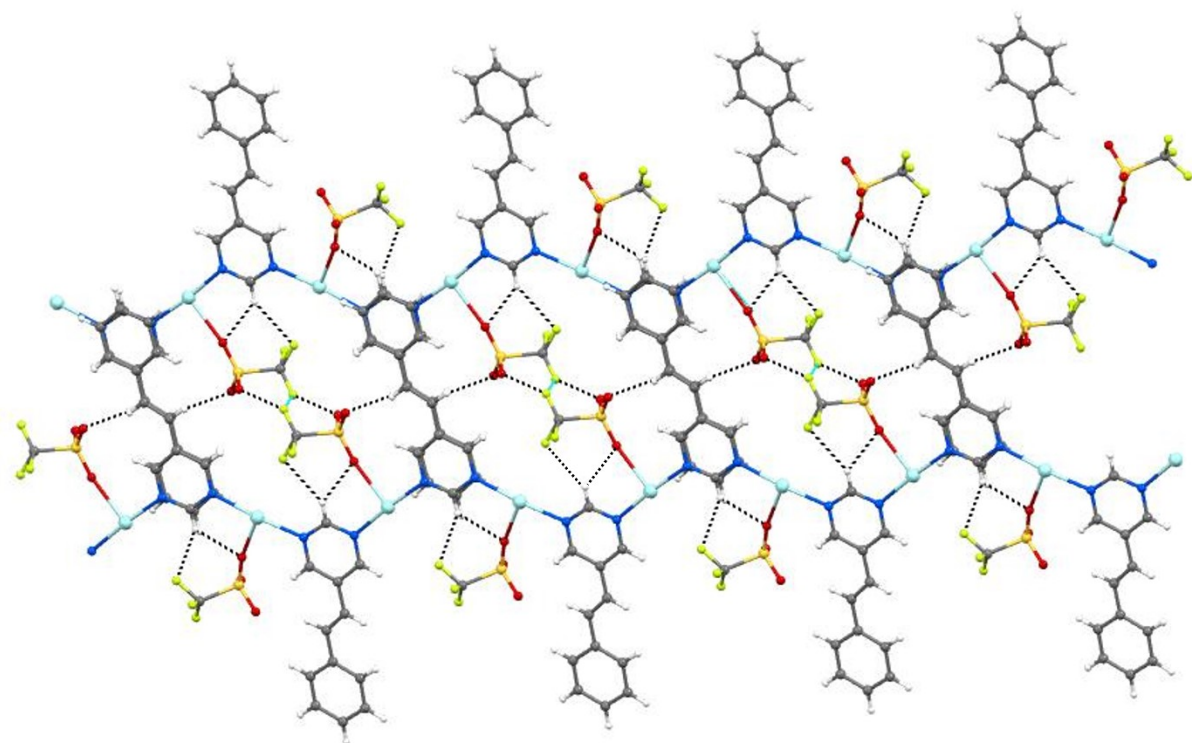

Fig. S7: Various weak interactions played by  $\text{CF}_3\text{SO}_3^-$  anion in **4**, viewed along  $a$ -direction.

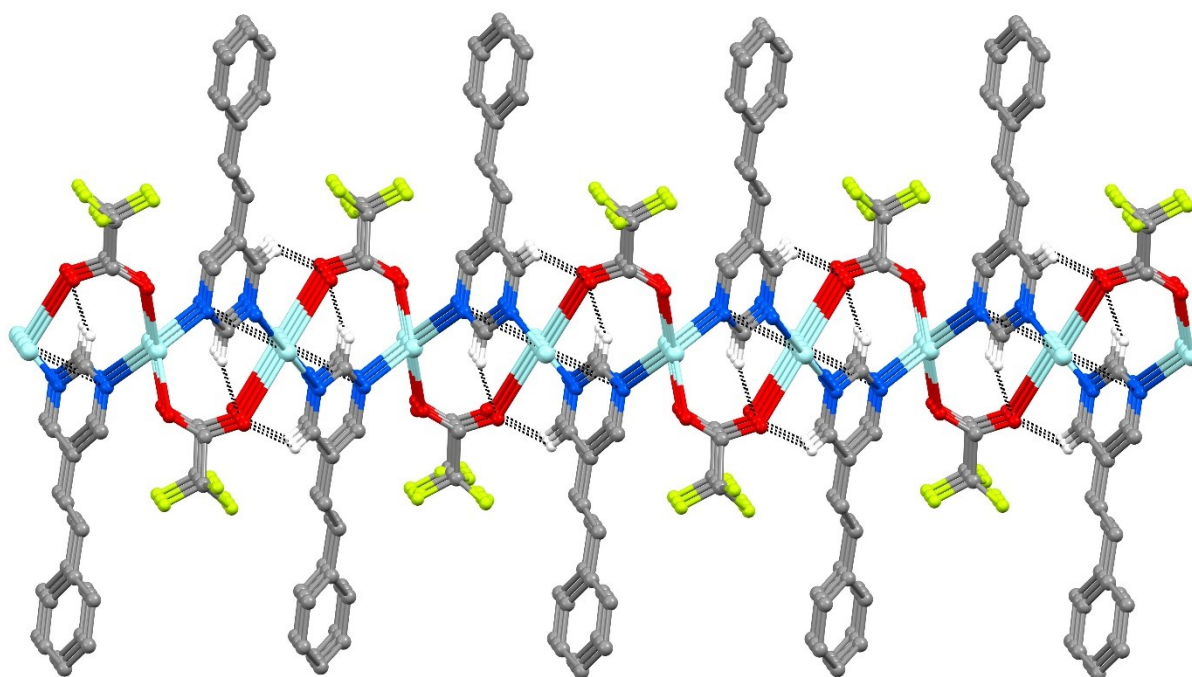

Fig. S8: Two-dimensional network of **5** is viewed approx. along  $b$ -axis.  $\text{C-H}\cdots\text{O}$  and  $\text{Ag(I)}\cdots\text{N}$  interactions can be observed.

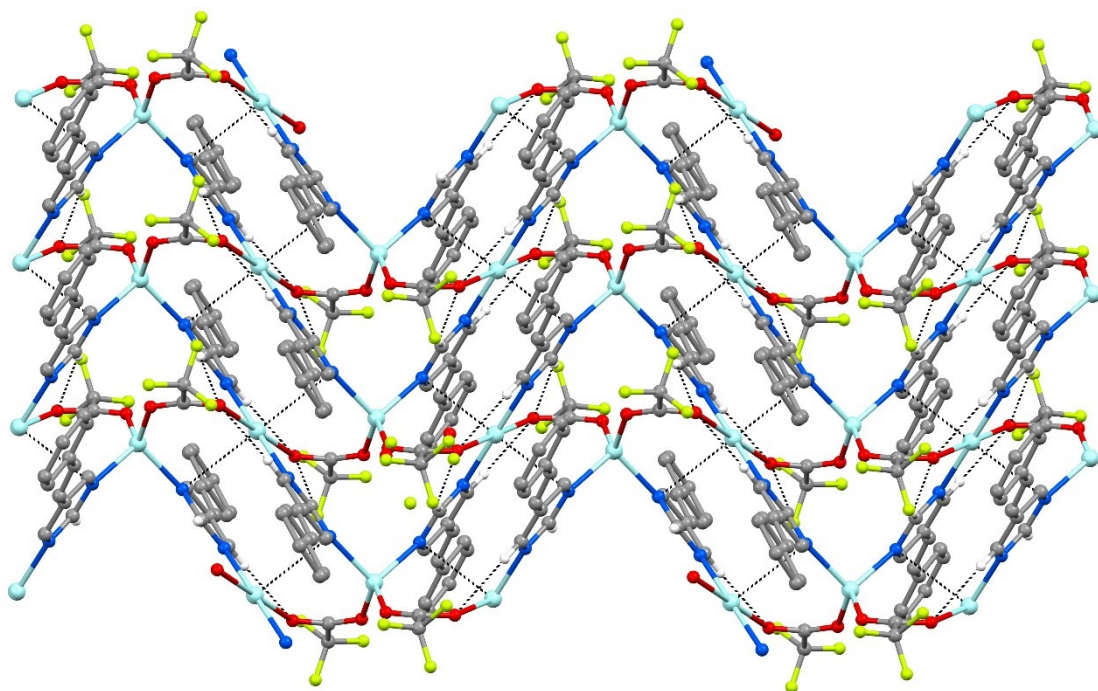

Fig. S9: Another view of two-dimensional network of **5** shows C–H⋯O and Ag(I)⋯N interactions present in **5**.

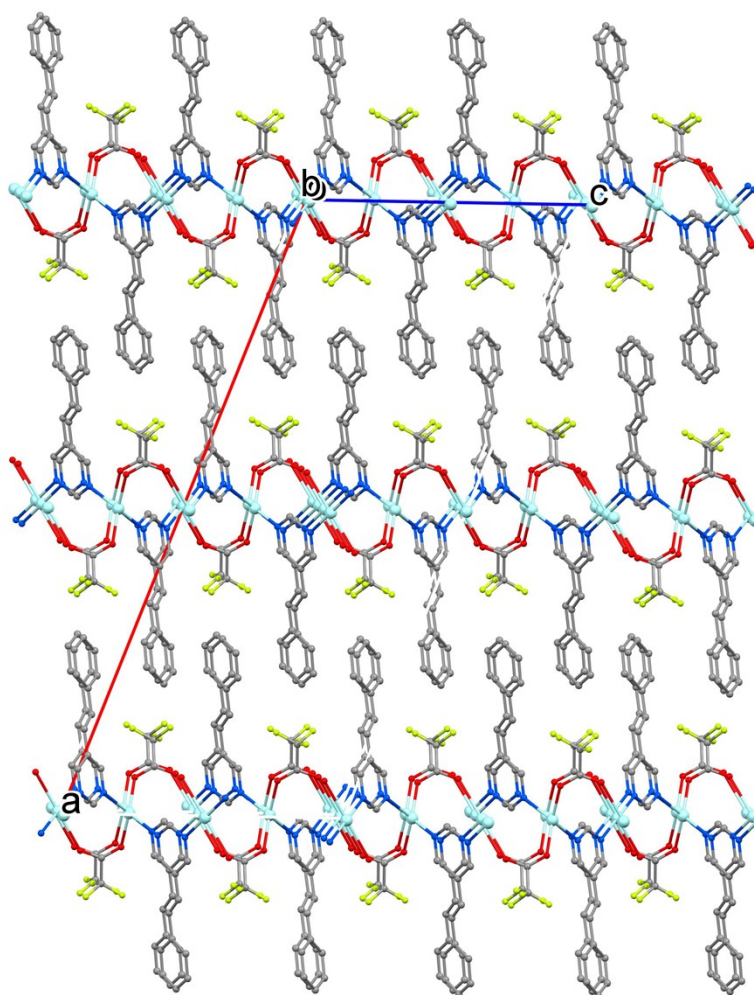

Fig. S10: Interdigitation of two-dimensional sheets of **5**, viewed along *b*-direction.



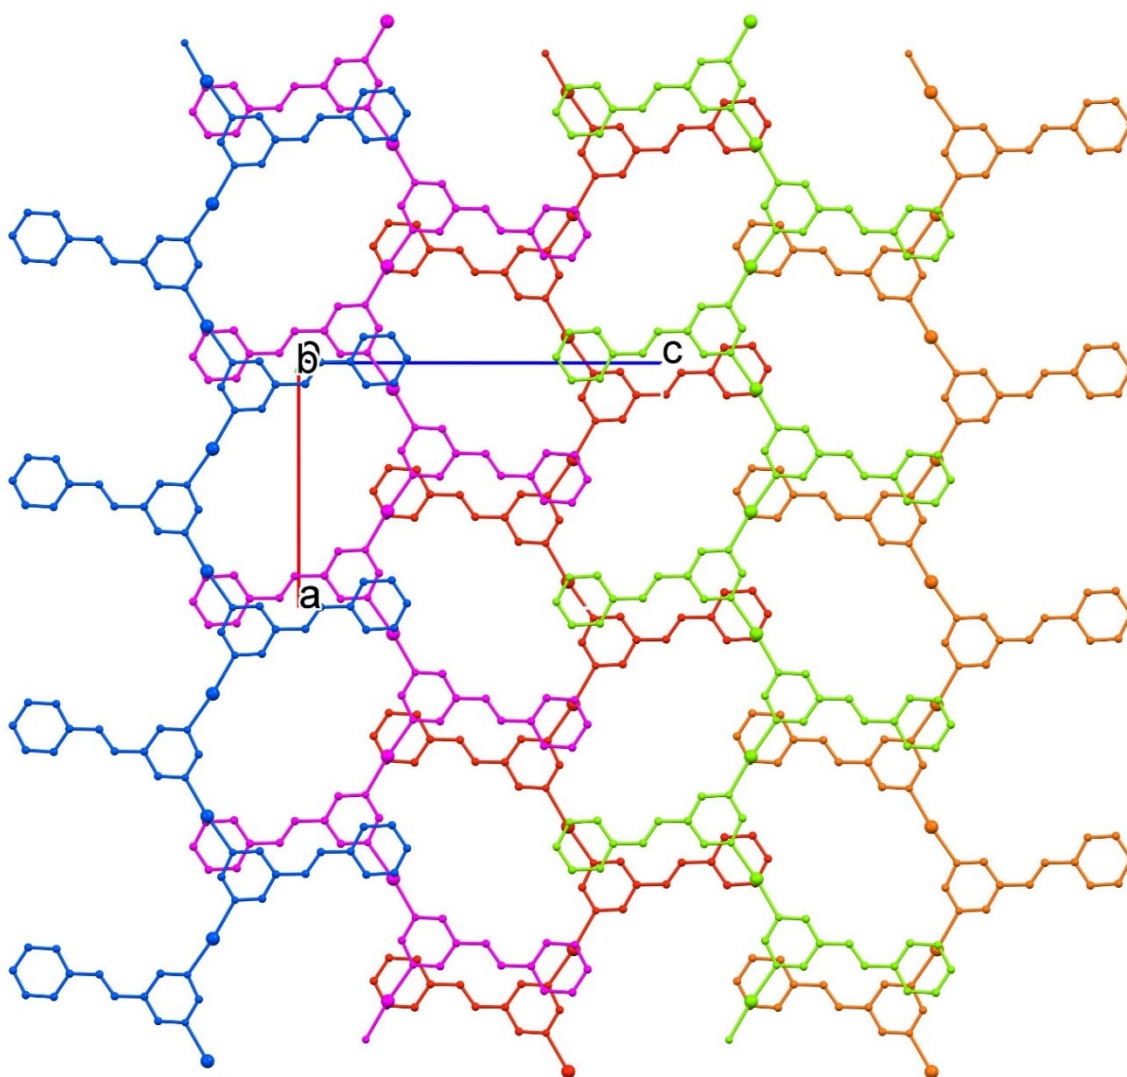

Fig. S11: Five parallel zigzag chains of 3 are shown in different colours. The chains propagate along *a*-direction. Chain growth due to photodimerization is expected to propagate along *b*-direction (infinitely parallel stacking). Also stacking of 5-Spym happens between two different chains of both the sides (left and right). So, the chain growth will also propagate along *c*-direction. Therefore, the photodimerized products is expected to have a three-dimensional network. Anions are not shown for clarity.

### 3. <sup>1</sup>H NMR Spectra

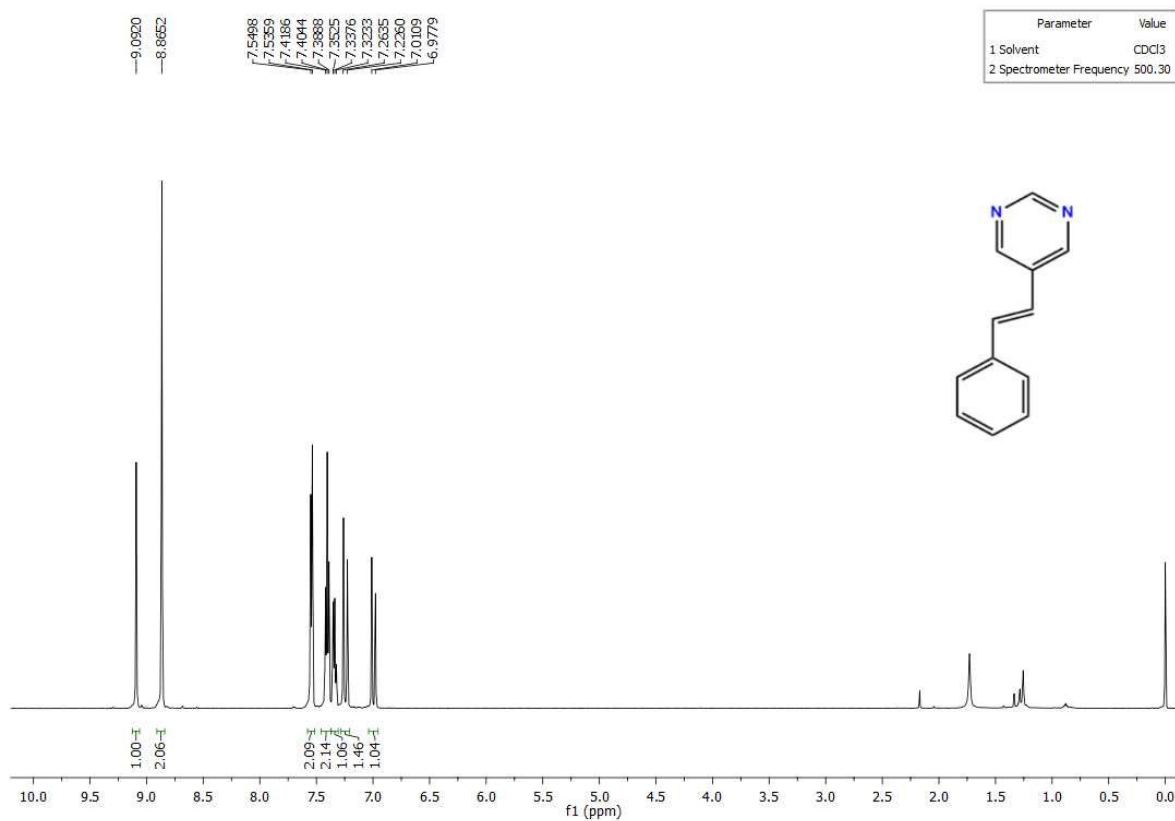

Fig. S12: <sup>1</sup>H NMR (500 MHz, CDCl<sub>3</sub>) spectrum of *trans*-5-Spym ligand.

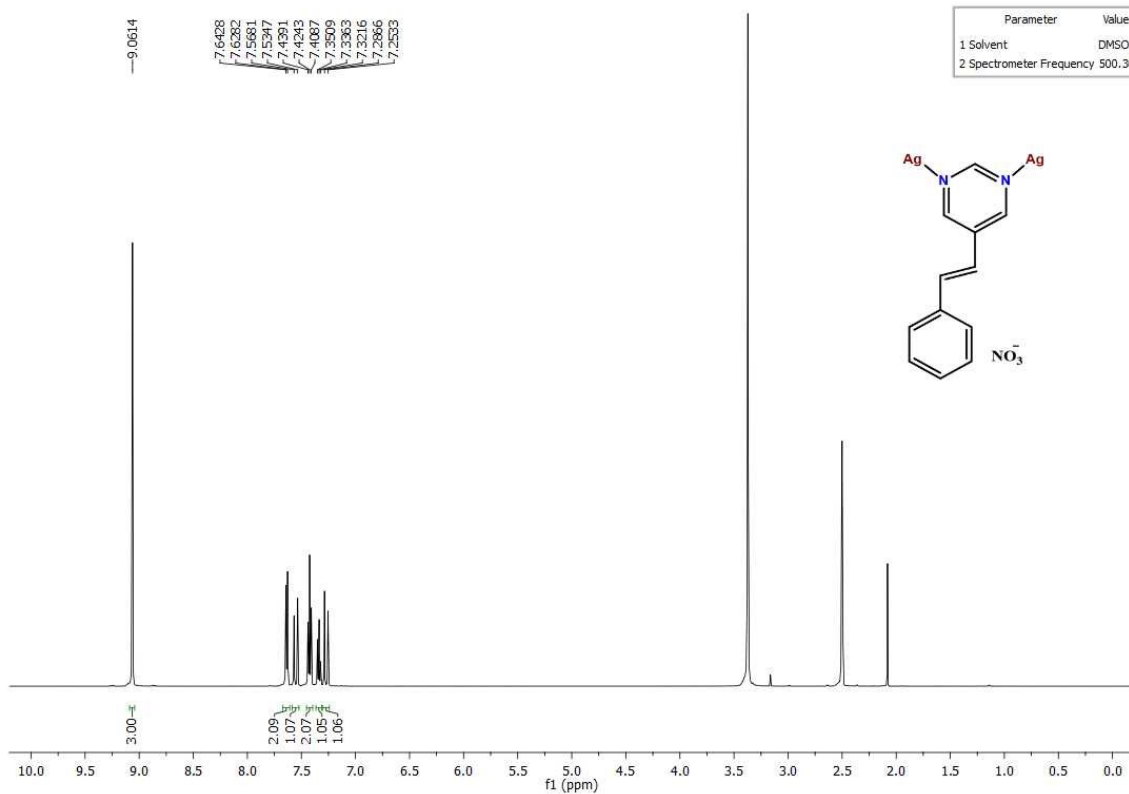

Fig. S13: <sup>1</sup>H NMR (500 MHz, DMSO-d<sub>6</sub>) spectrum of **1** before irradiation under sunlight.

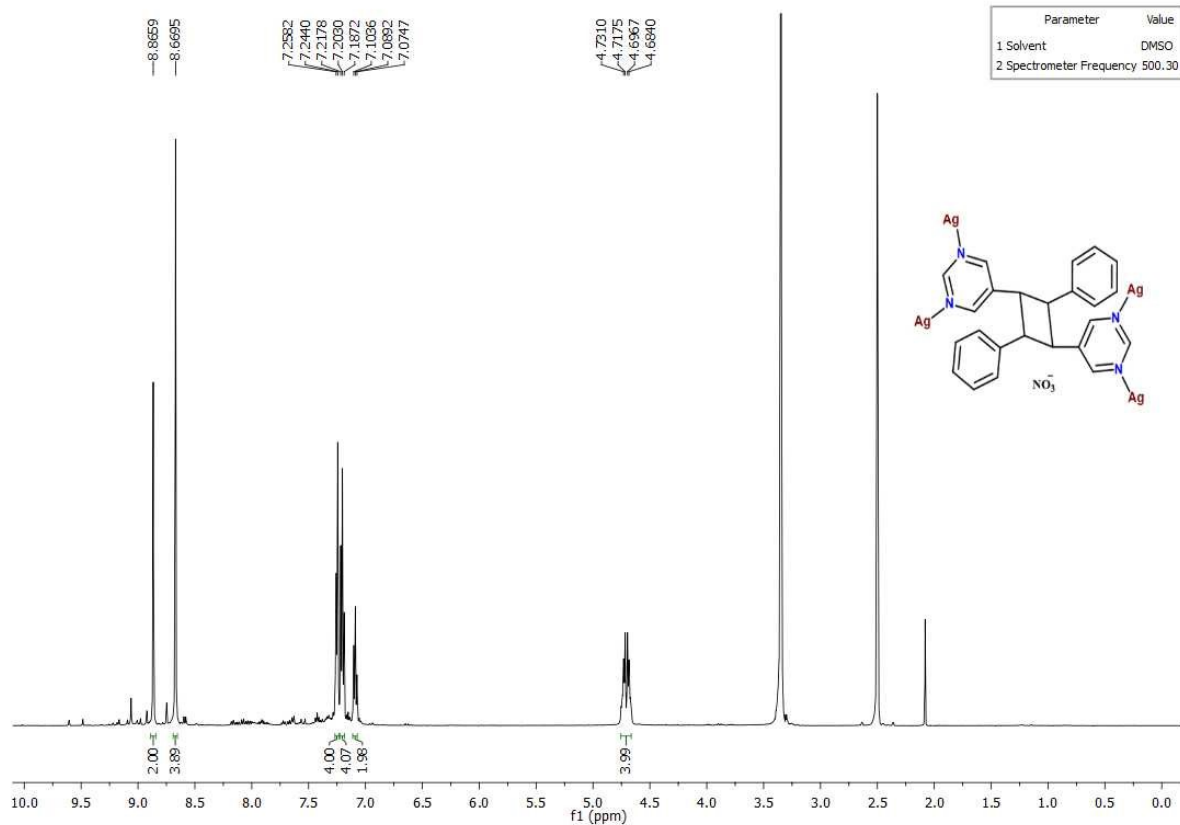

Fig. S14:  $^1\text{H}$  NMR (500 MHz,  $\text{DMSO-d}_6$ ) spectrum of **1** after irradiation under sunlight.

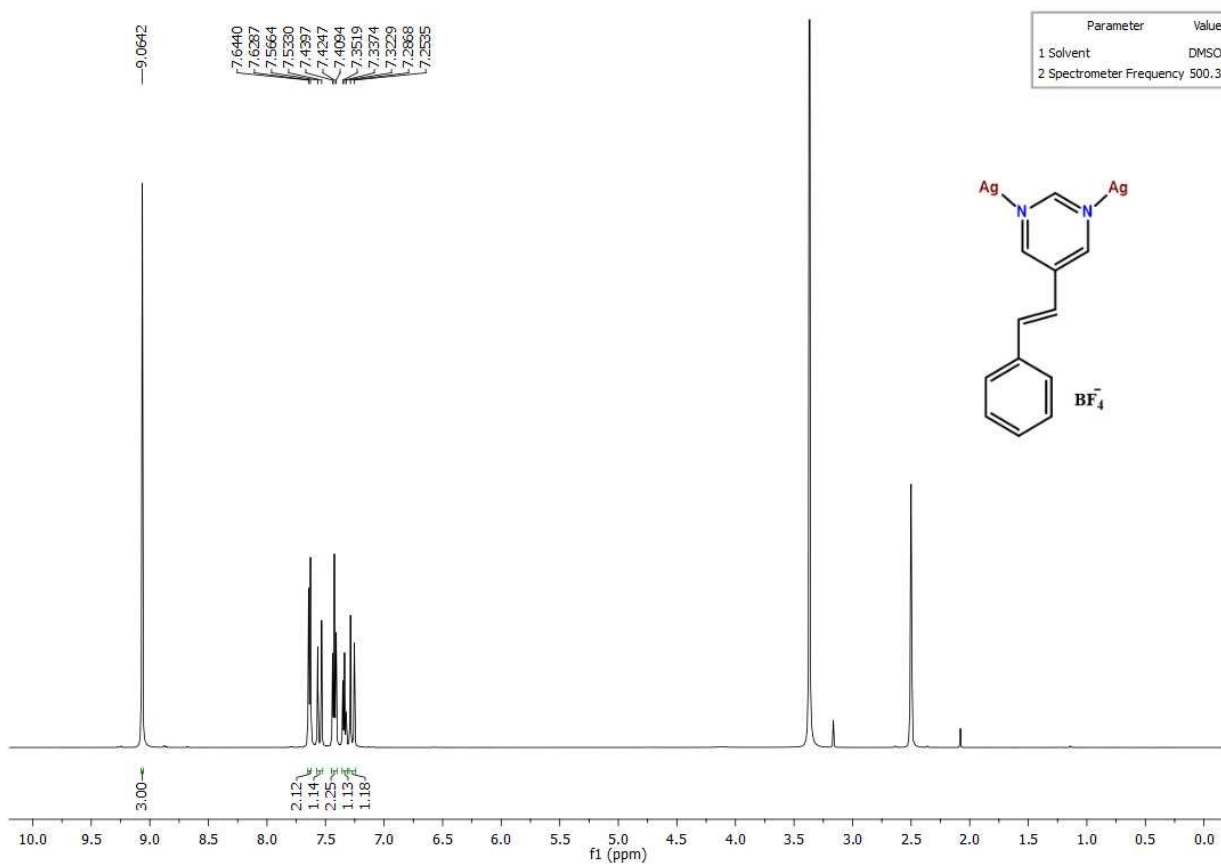

Fig. S15:  $^1\text{H}$  NMR (500 MHz,  $\text{DMSO-d}_6$ ) spectrum of **2** before irradiation under sunlight.

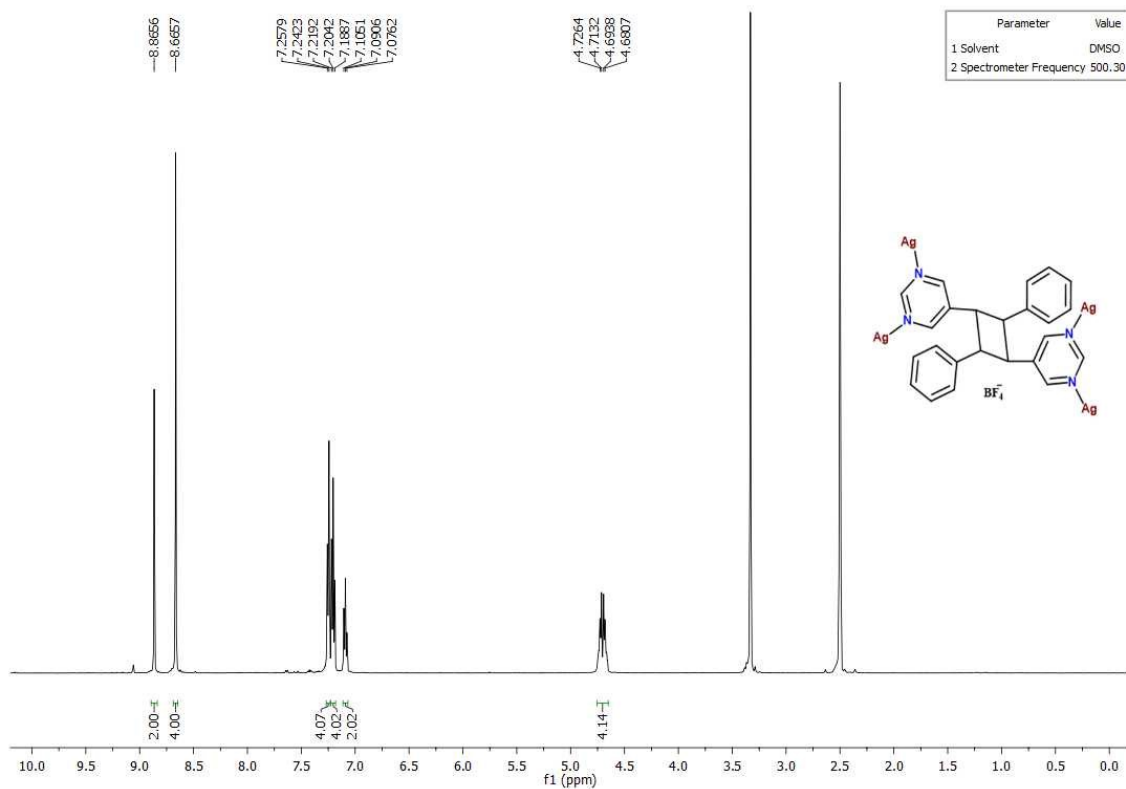

Fig. S16:  $^1\text{H}$  NMR (500 MHz,  $\text{DMSO-d}_6$ ) spectrum of **2** after irradiation under the sunlight.

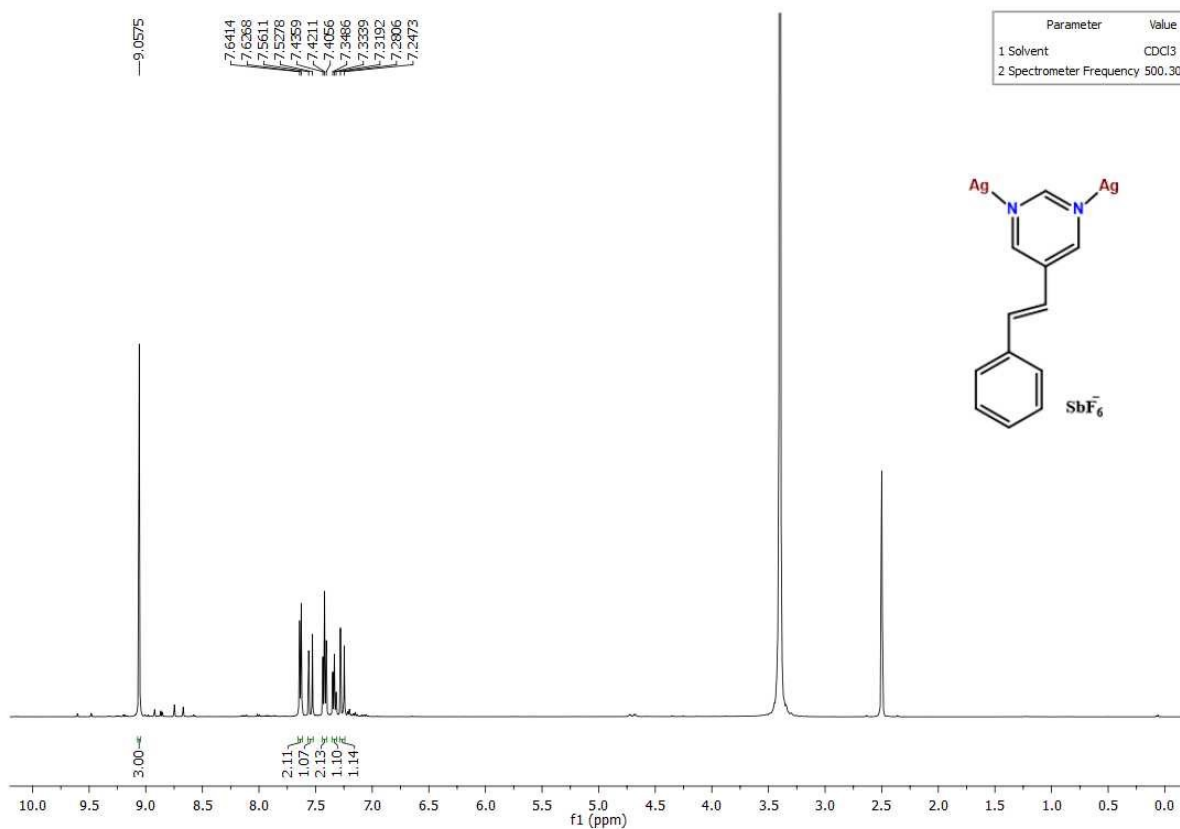

Fig. S17:  $^1\text{H}$  NMR (500 MHz,  $\text{DMSO-d}_6$ ) spectrum of **3** before irradiation under sunlight.

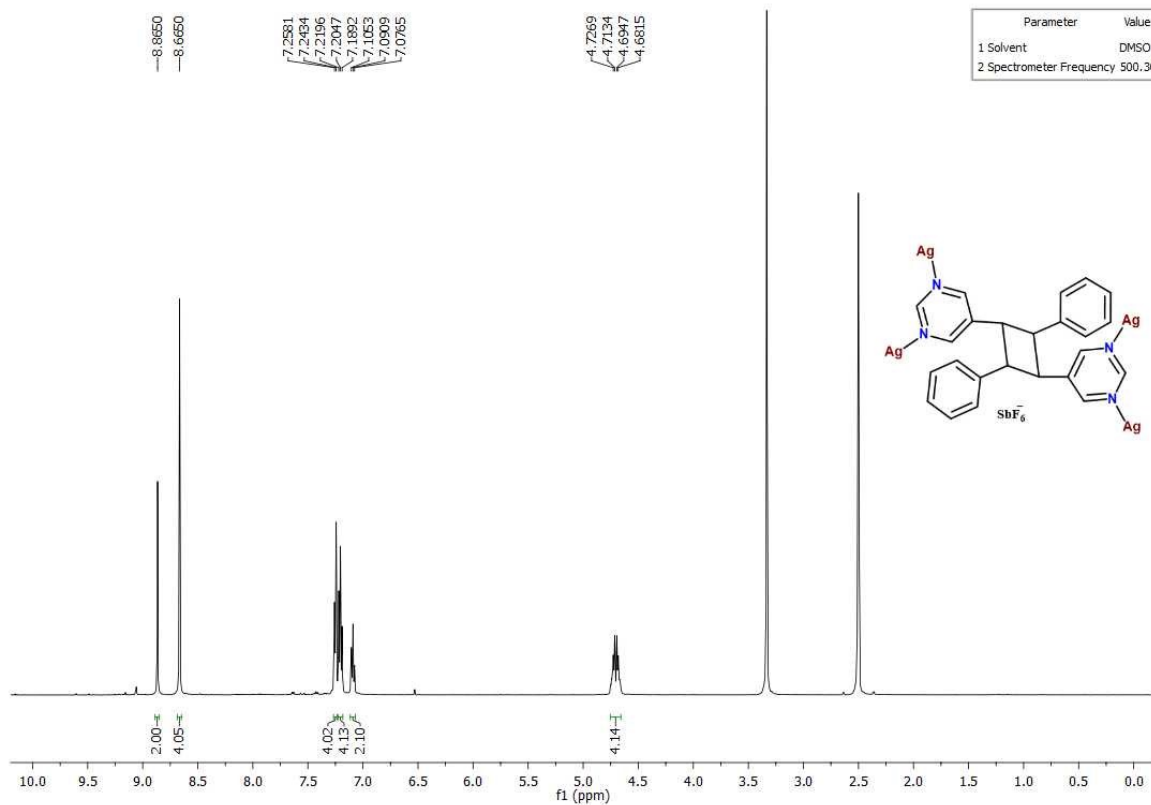

Fig. S18:  $^1\text{H}$  NMR (500 MHz, DMSO- $d_6$ ) spectrum of **3** after irradiation under the sunlight.

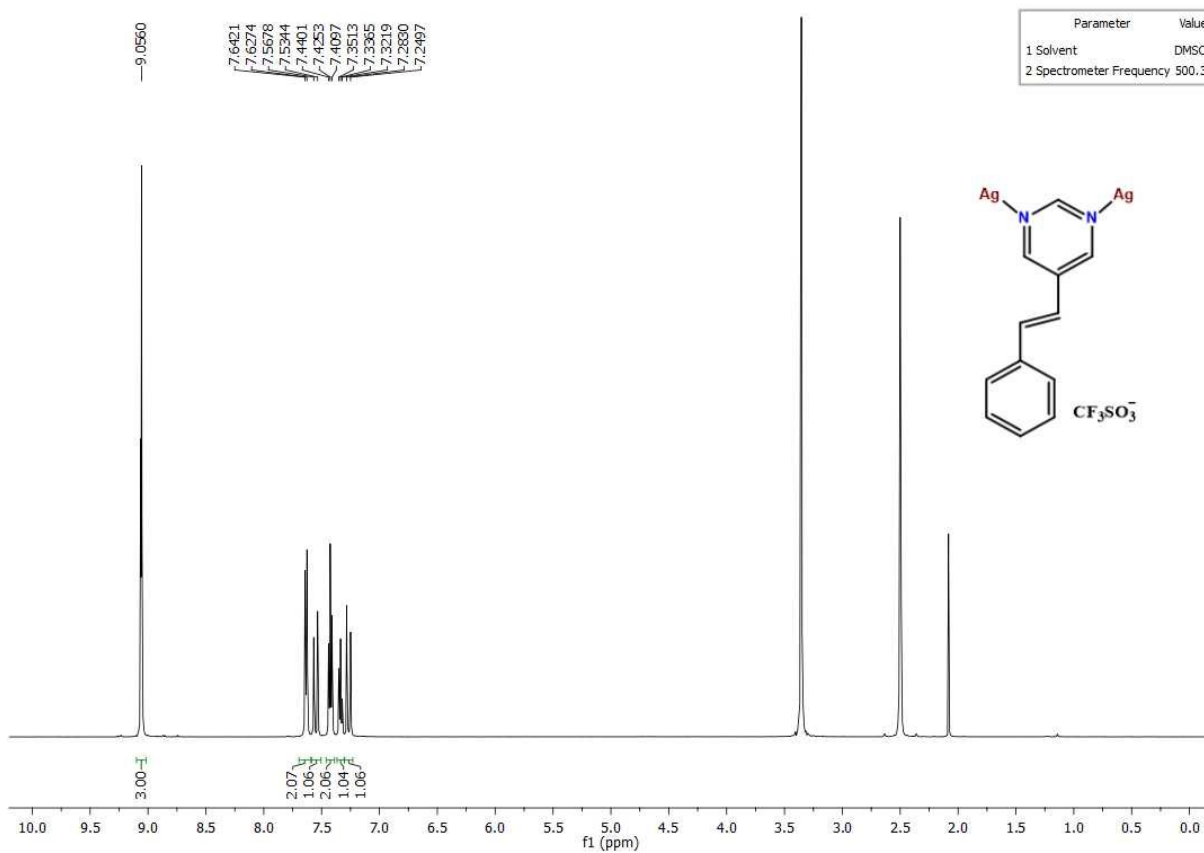

Fig. S19:  $^1\text{H}$  NMR (500 MHz, DMSO- $d_6$ ) spectrum of **4** before irradiation under sunlight.

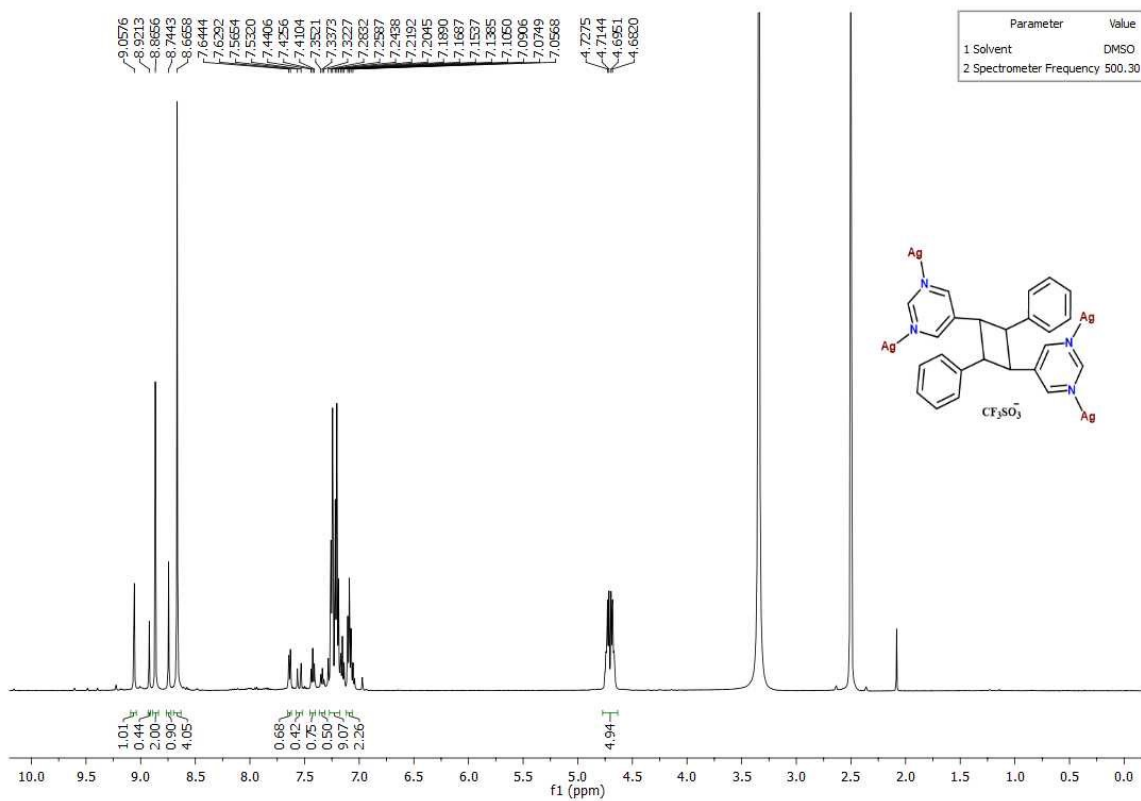

Fig. S20:  $^1\text{H}$  NMR (500 MHz,  $\text{DMSO-d}_6$ ) spectrum of **4** after irradiation under the sunlight.

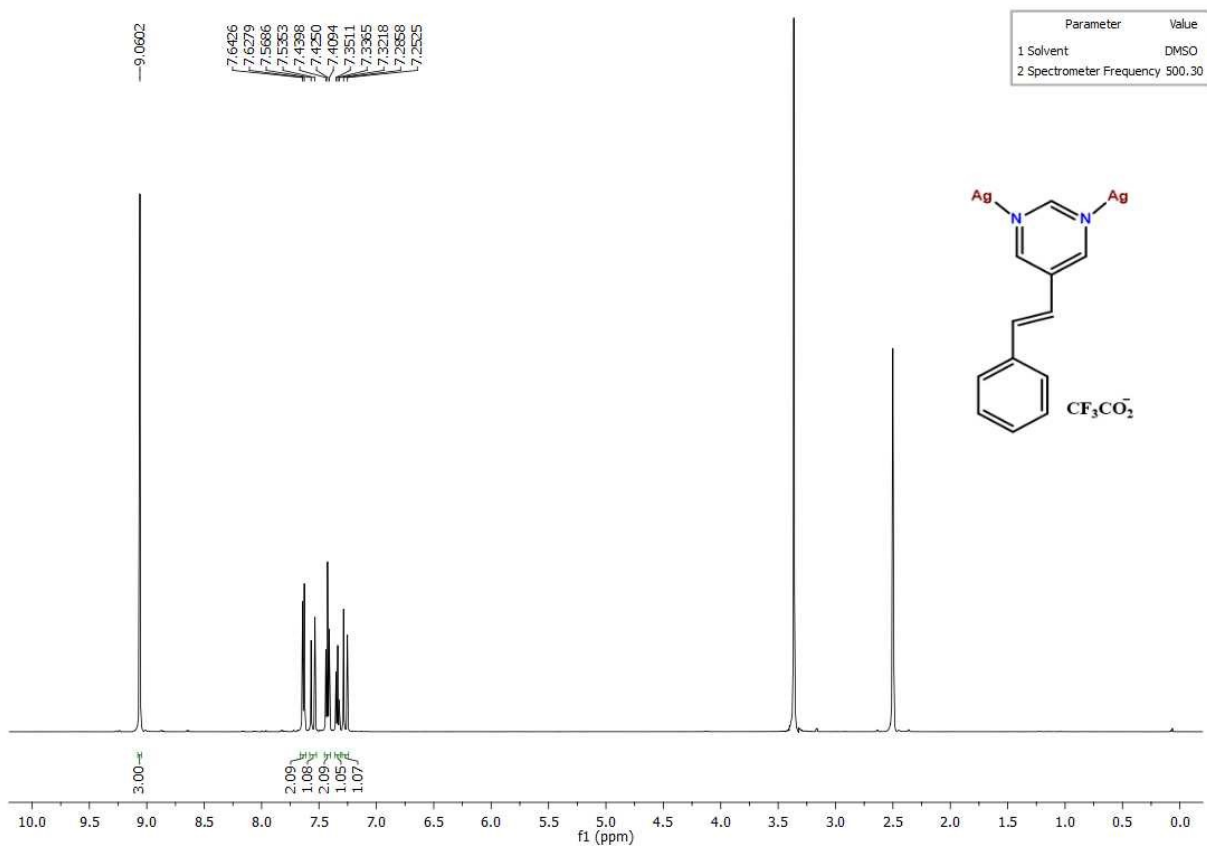

Fig. S21:  $^1\text{H}$  NMR (500 MHz,  $\text{DMSO-d}_6$ ) spectrum of **5** before irradiation under sunlight.

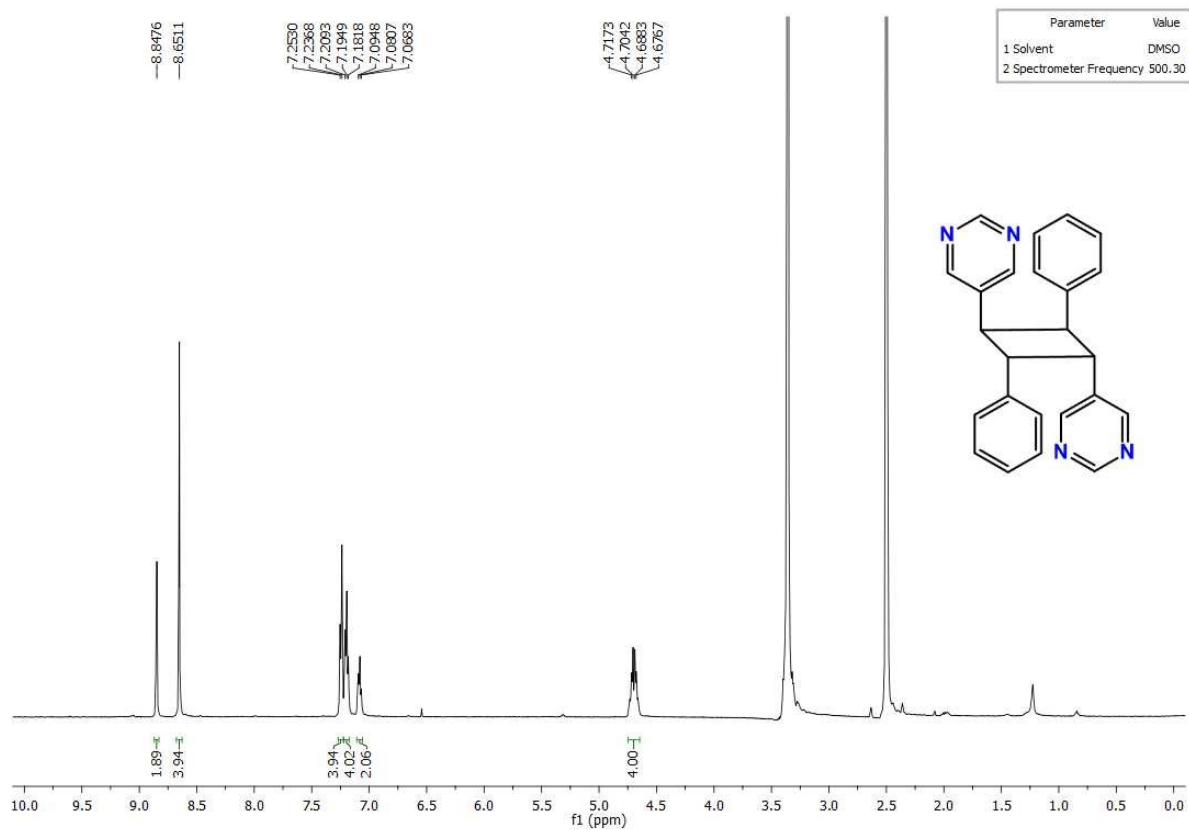

Fig. S22:  $^1\text{H}$  NMR (500 MHz,  $\text{DMSO-d}_6$ ) spectrum of isolated *rctt-bpcb*.

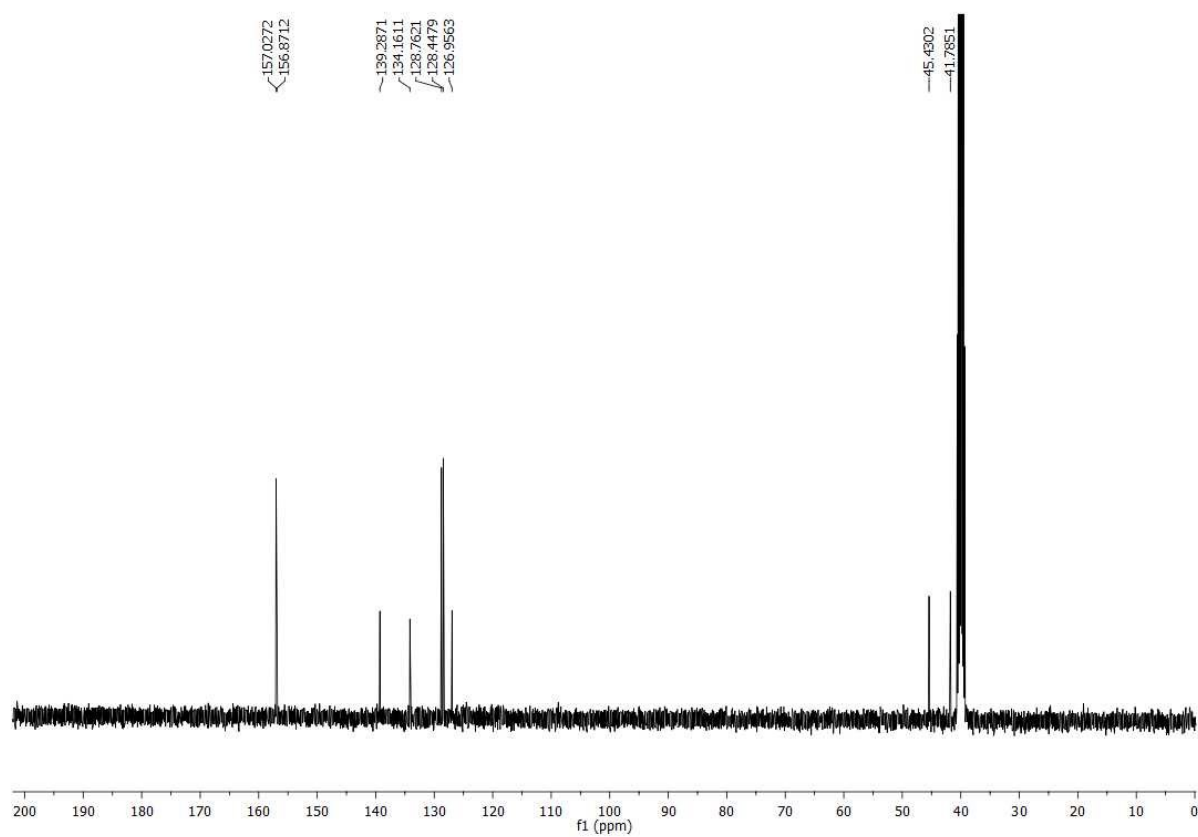

Fig. S23:  $^{13}\text{C}$  NMR (101 MHz,  $\text{DMSO-d}_6$ ) spectrum of isolated *rctt-bpcb*.

#### 4. FT-IR Spectra

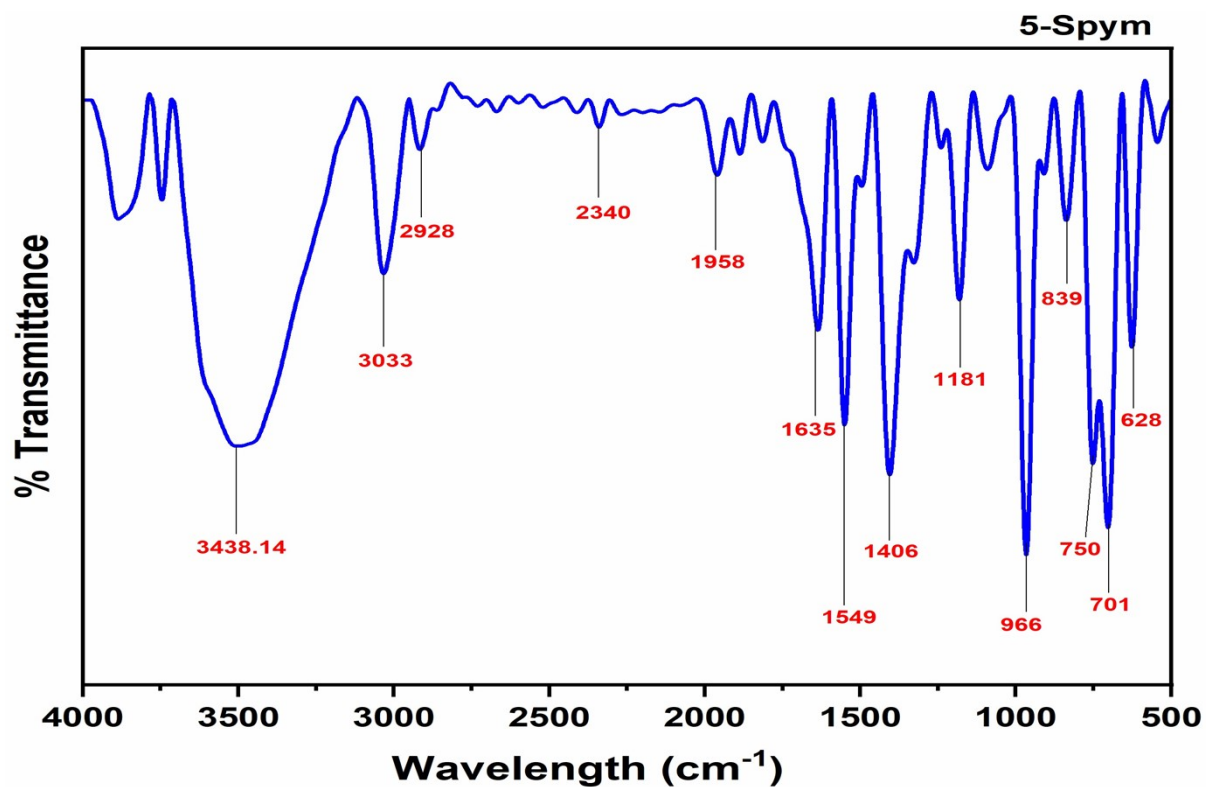

Fig. S24: FT-IR (KBr, cm<sup>-1</sup>) spectrum of 5-Spym.

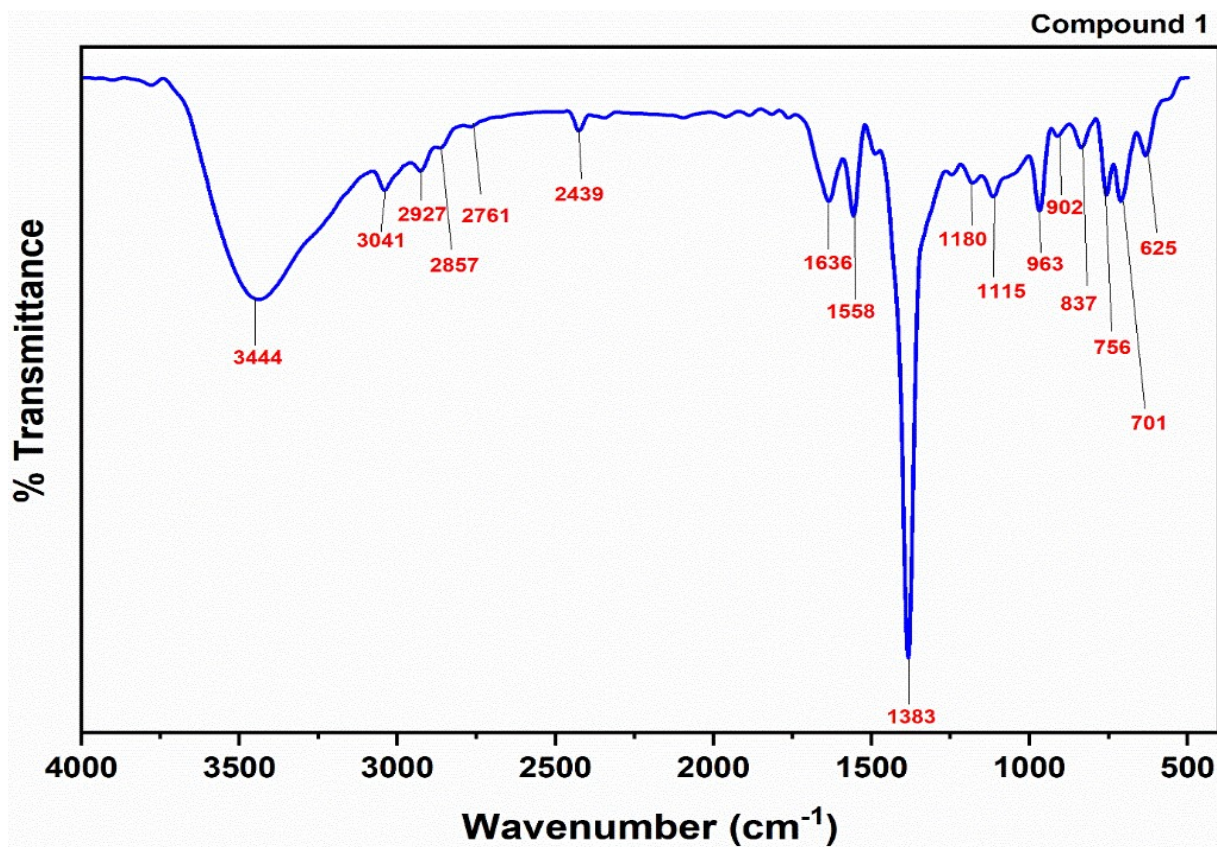

Fig. S25: FT-IR (KBr, cm<sup>-1</sup>) spectrum of 1.



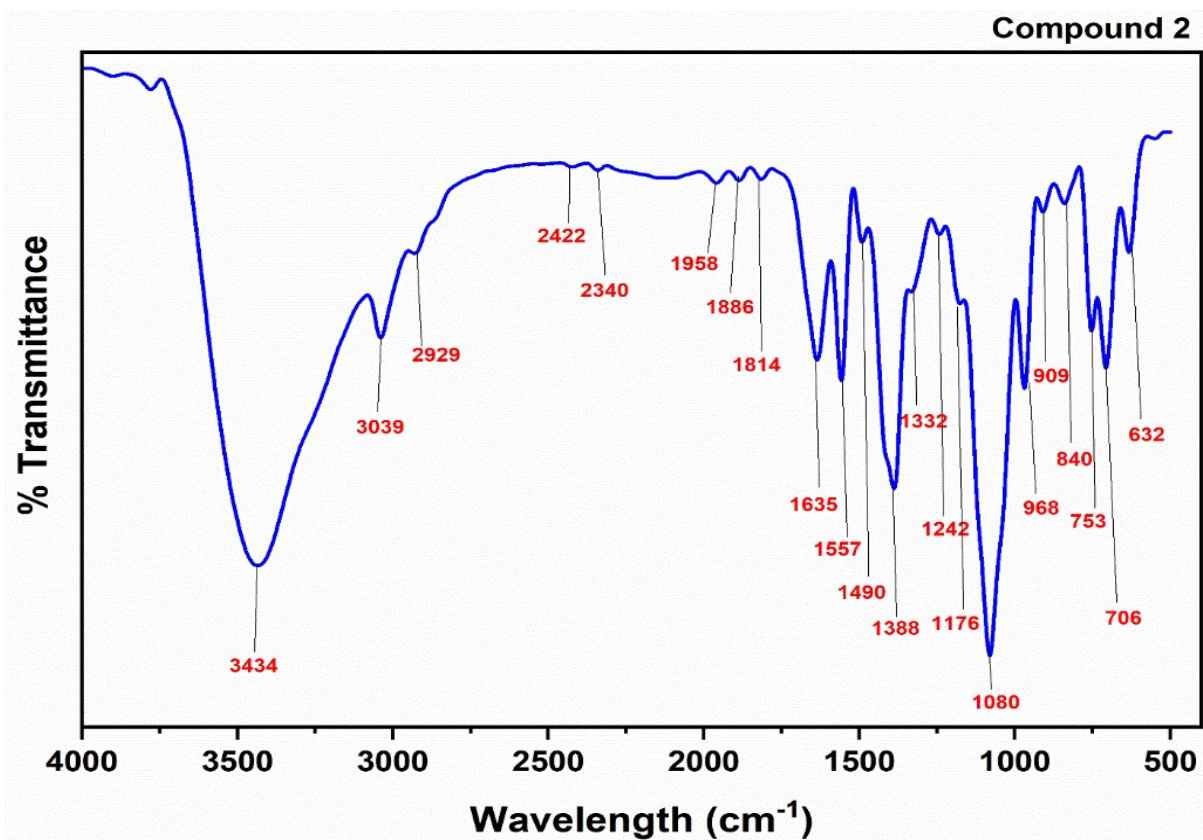

Fig. S26: FT-IR (KBr,  $\text{cm}^{-1}$ ) spectrum of 2.

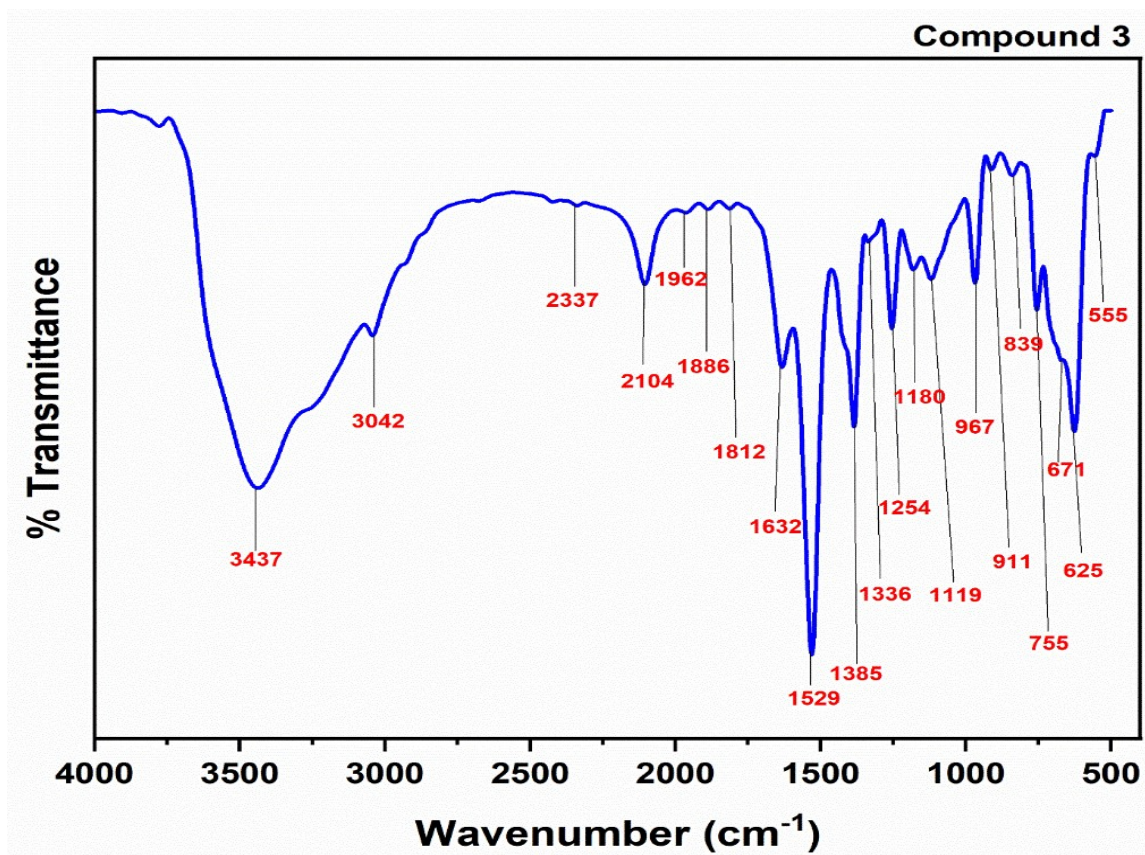

Fig. S27: FT-IR (KBr,  $\text{cm}^{-1}$ ) spectrum of 3.

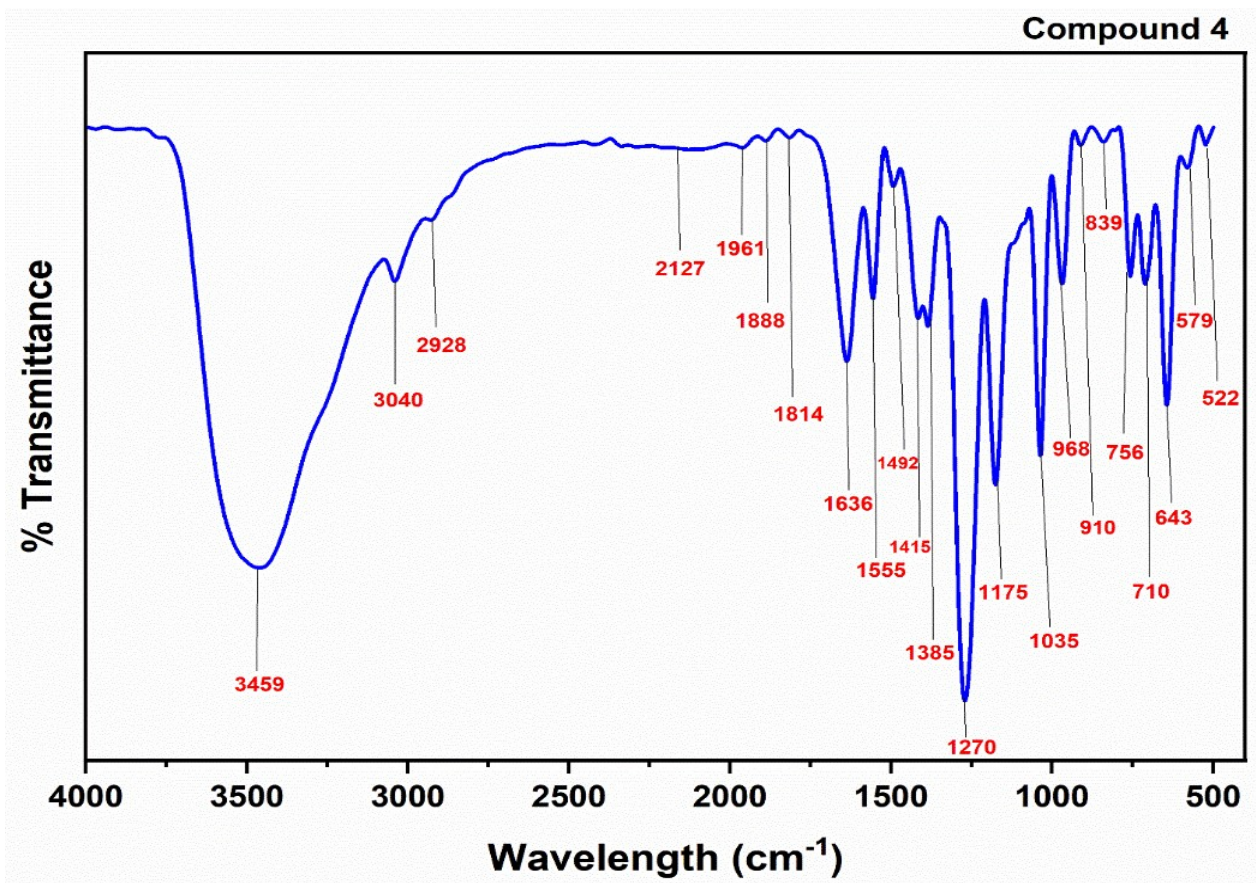

Fig. S28: FT-IR (KBr, cm<sup>-1</sup>) spectrum of 4.

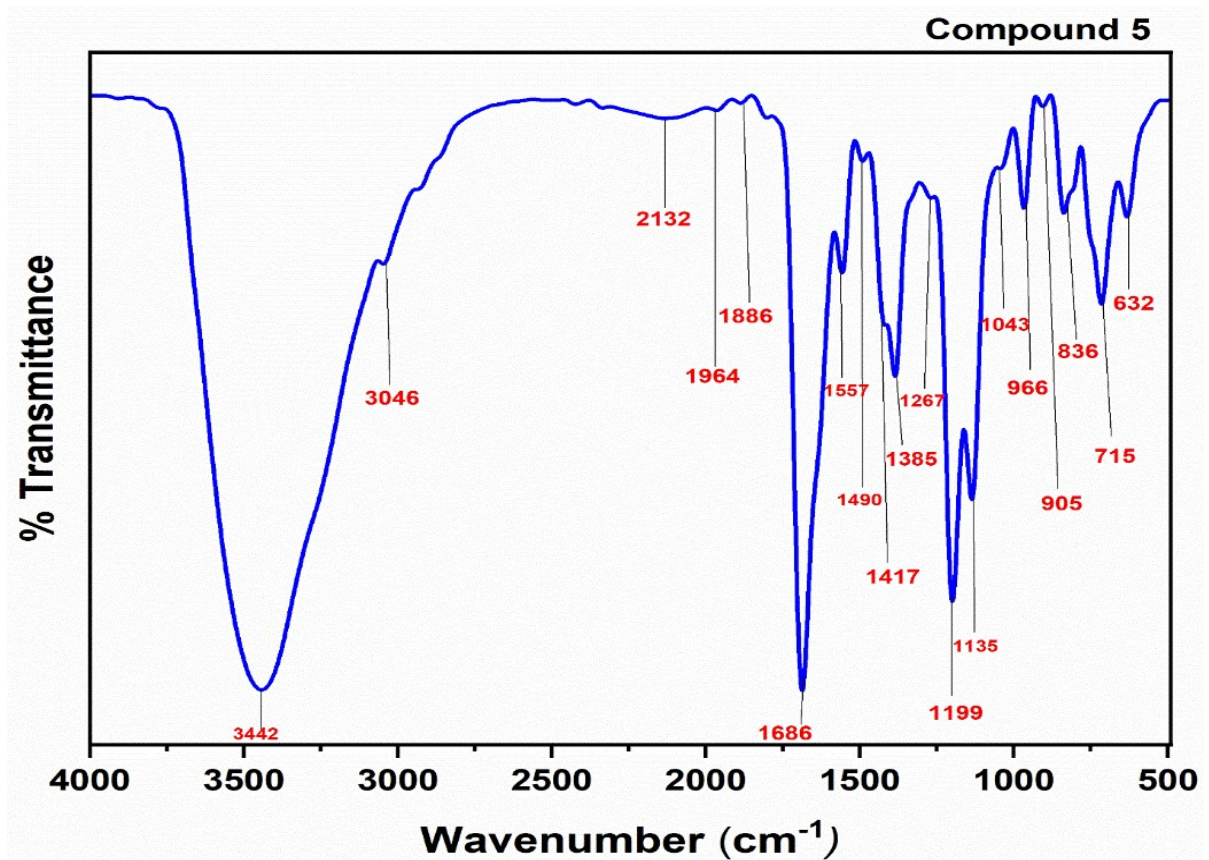

Fig. S29: FT-IR (KBr, cm<sup>-1</sup>) spectrum of 5.

## 5. UV-Vis absorption spectroscopy

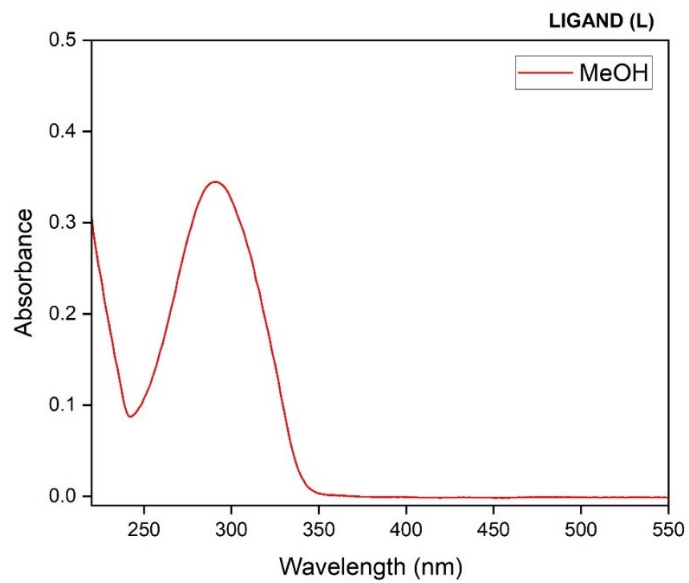

Fig. S30: UV spectrum of *trans*-5-Spym.

## 6. Analyses of Hirshfeld surfaces

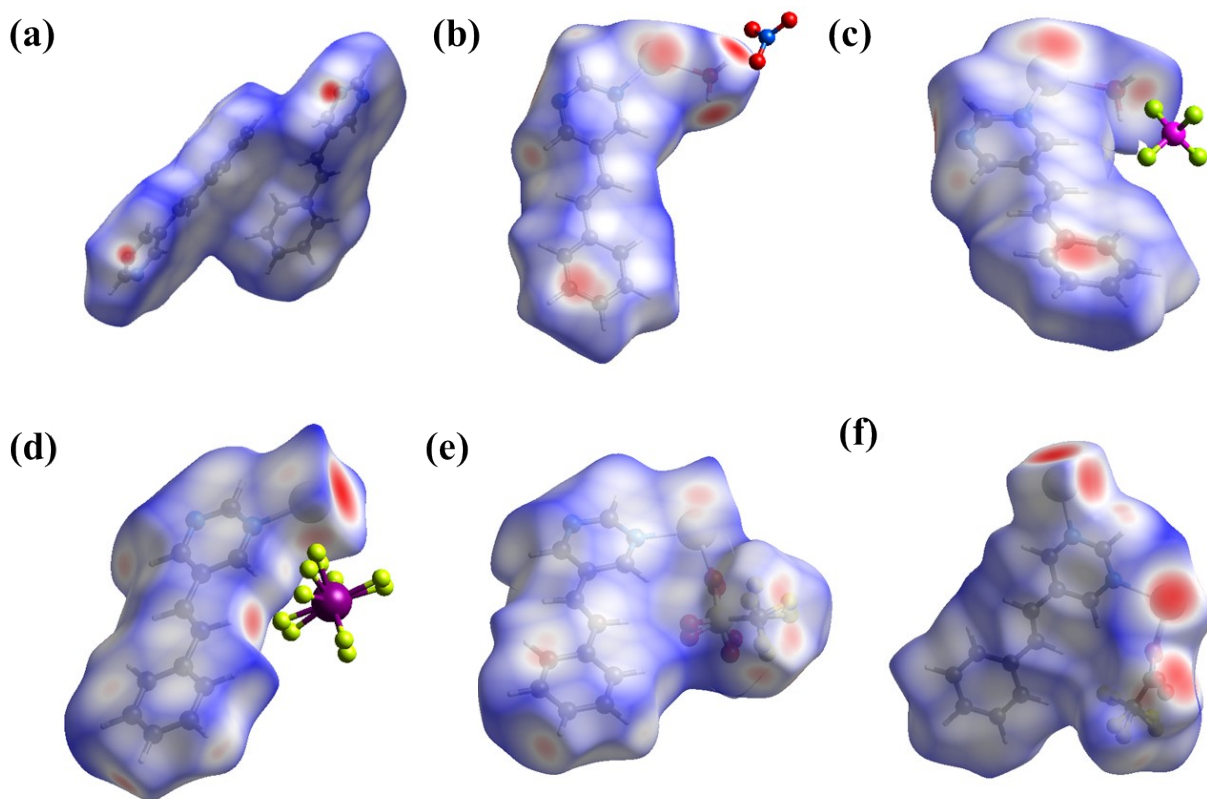

Fig. S31: Additional images of Hirshfeld surfaces mapped for  $d_{\text{norm}}$  for 5-Spym (a), and 1 – 5 (b-f).

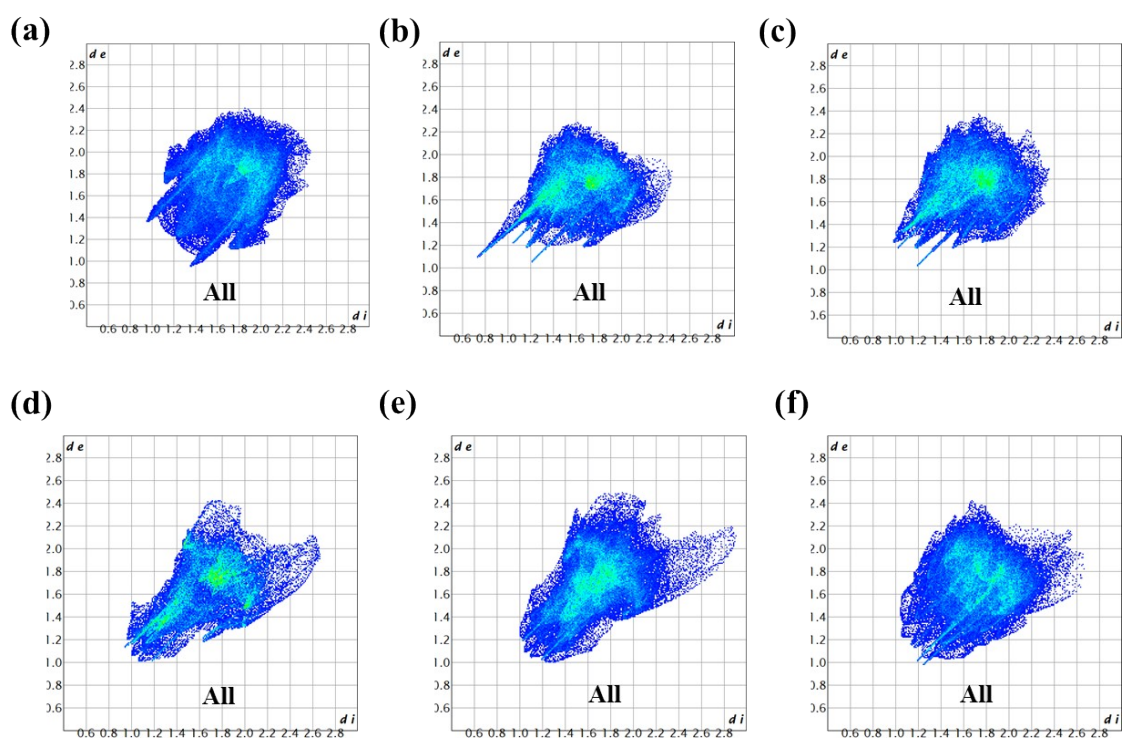

Fig. S32: Full 2D fingerprint plots for 5-Spym (a) and 1 – 5 (b – f).

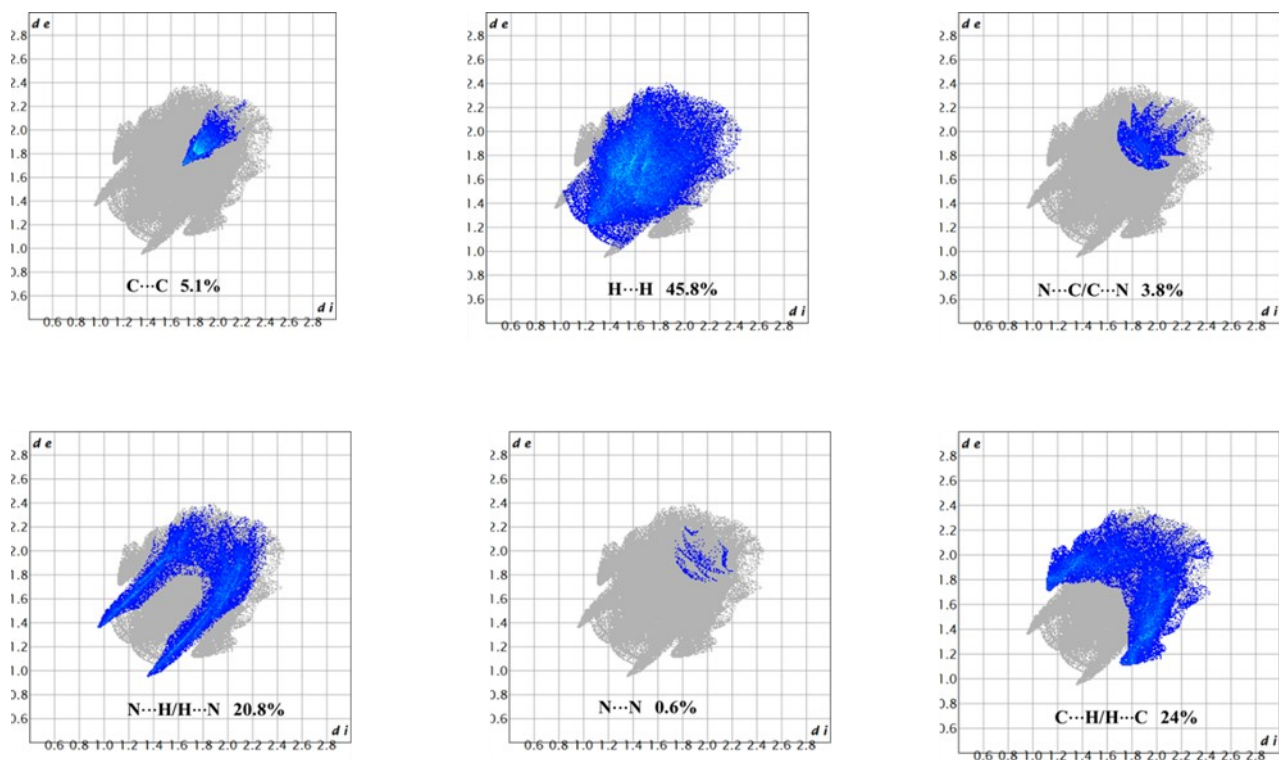

Fig. S33: Full fingerprint plot is resolved for various types of interactions and the percentage of their contributions to the total Hirshfeld surface area are presented for 5-Spym.

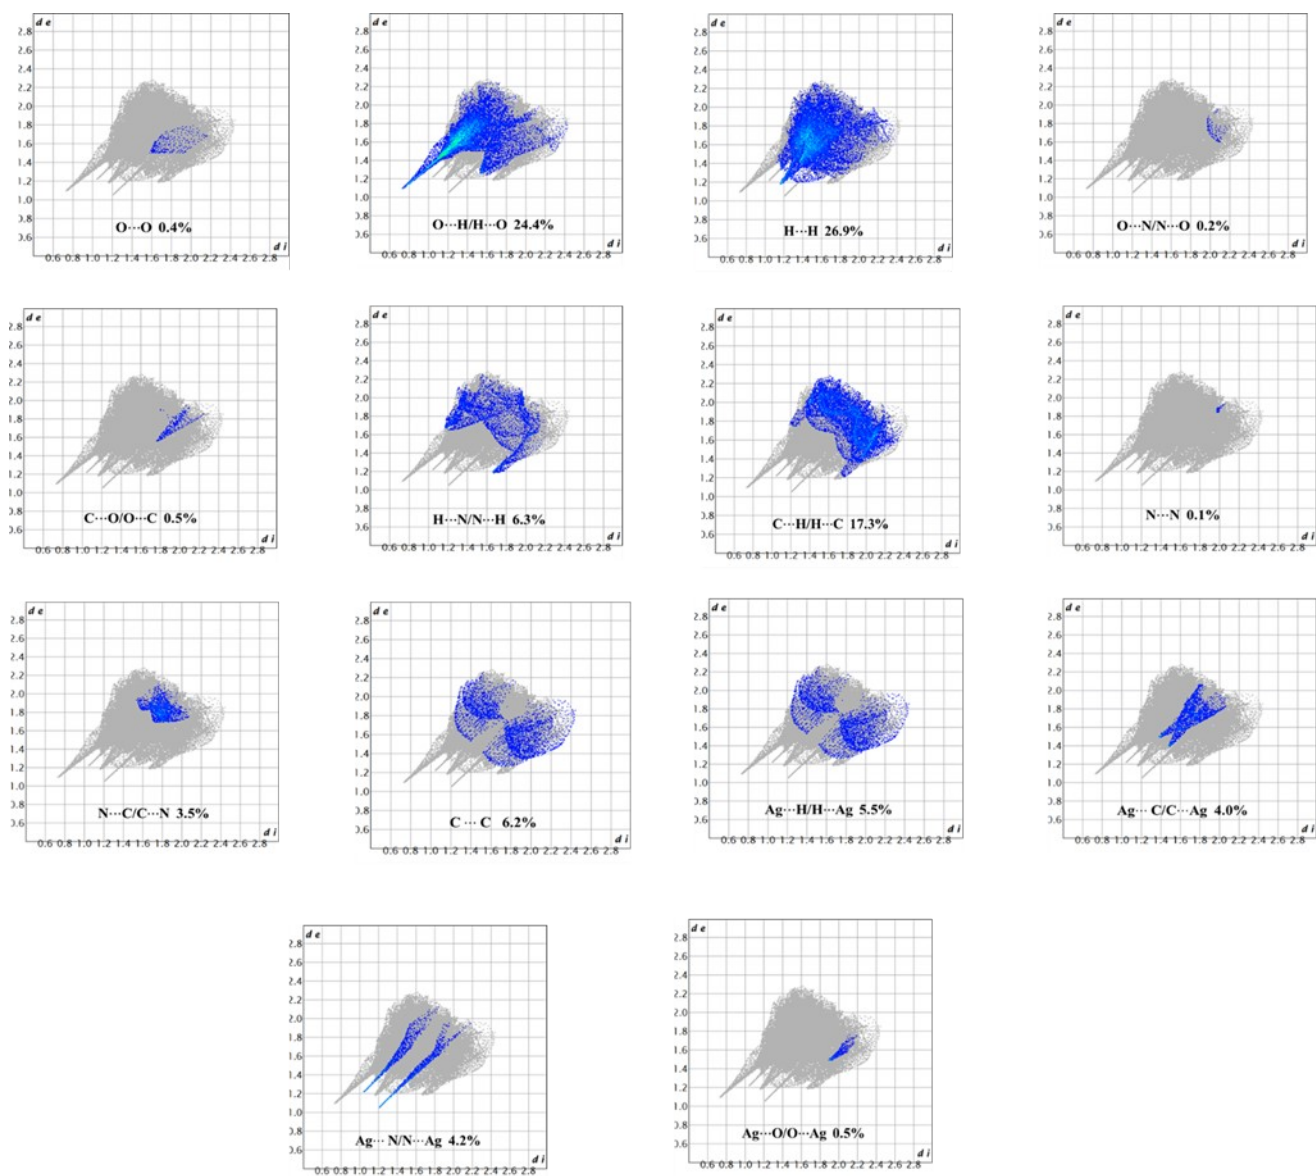

Fig. S34: Full fingerprint plot is resolved for various types of interactions and the percentage of their contributions to the total Hirshfeld surface area are presented for **1**.

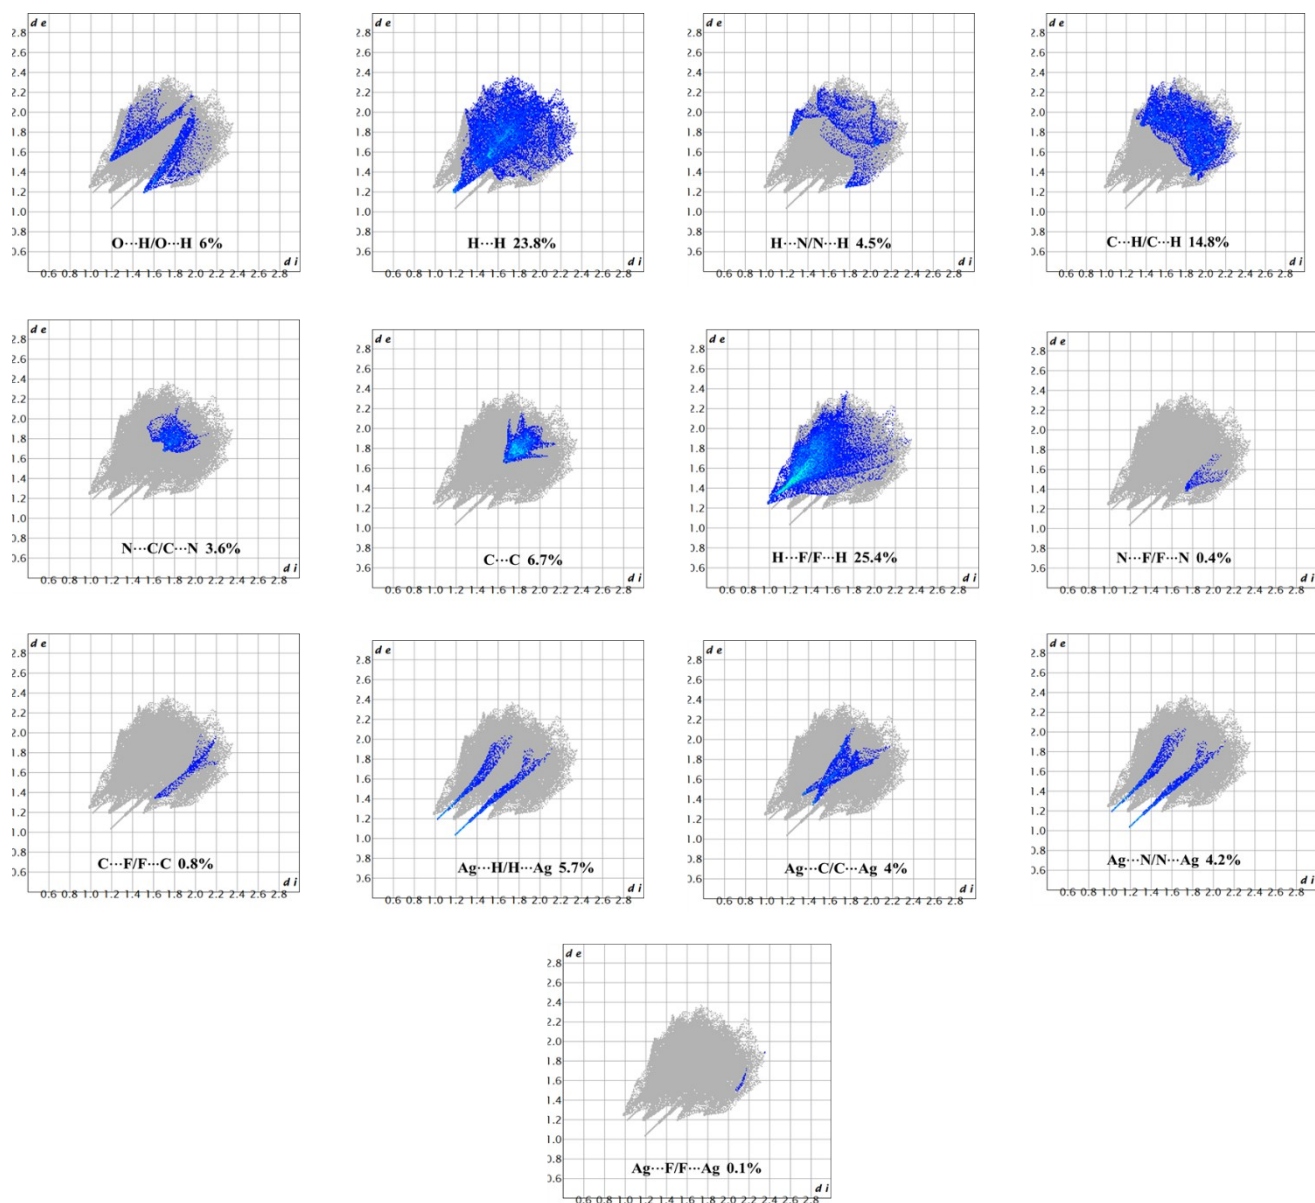

Fig. S35: Full fingerprint plot is resolved for various types of interactions and the percentage of their contributions to the total Hirshfeld surface area are presented for **2**.

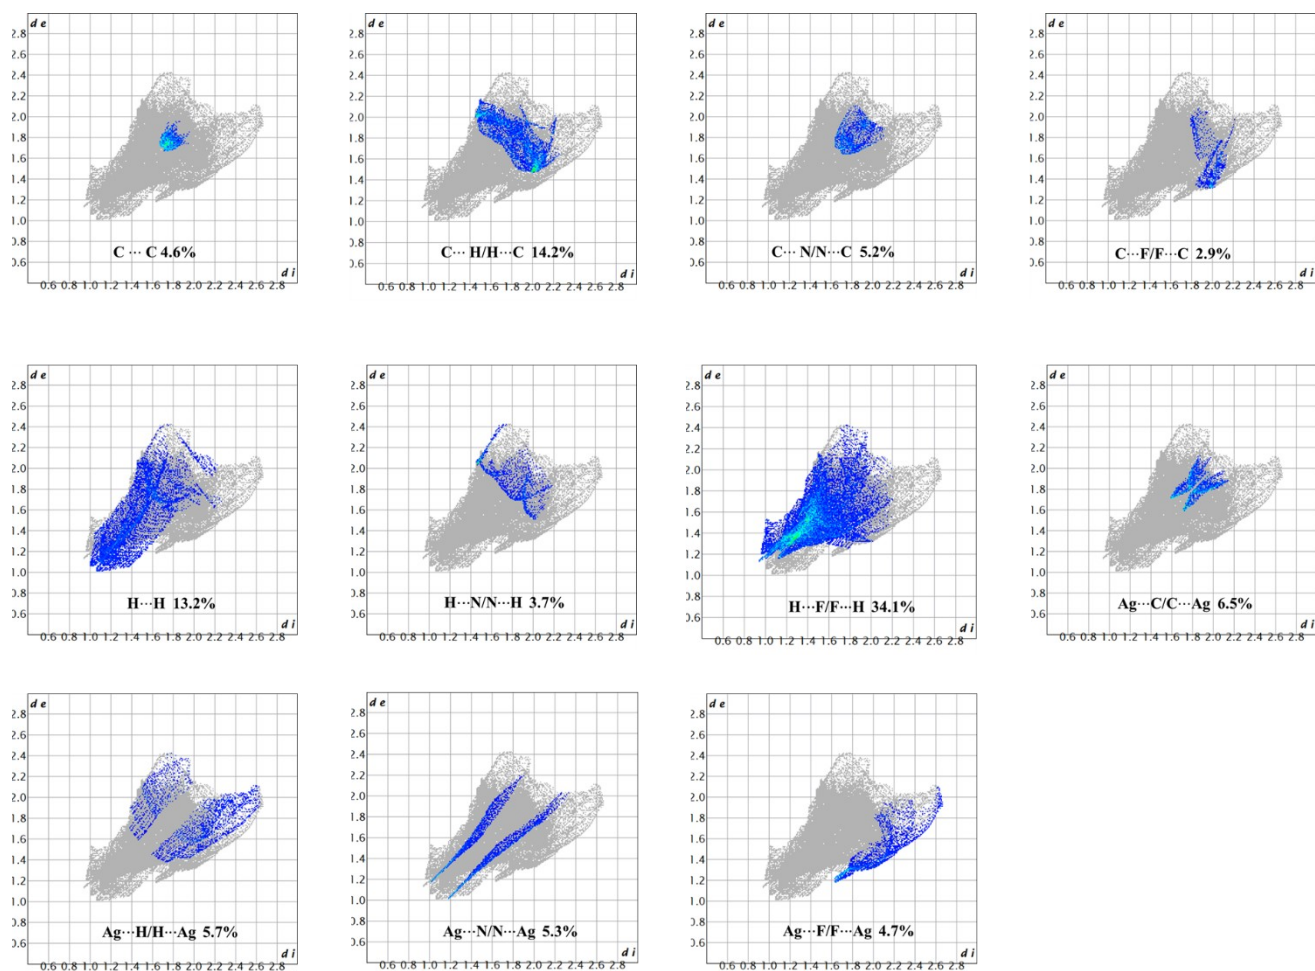

Fig. S36: Full fingerprint plot is resolved for various types of interactions and the percentage of their contributions to the total Hirshfeld surface area are presented for **3**.

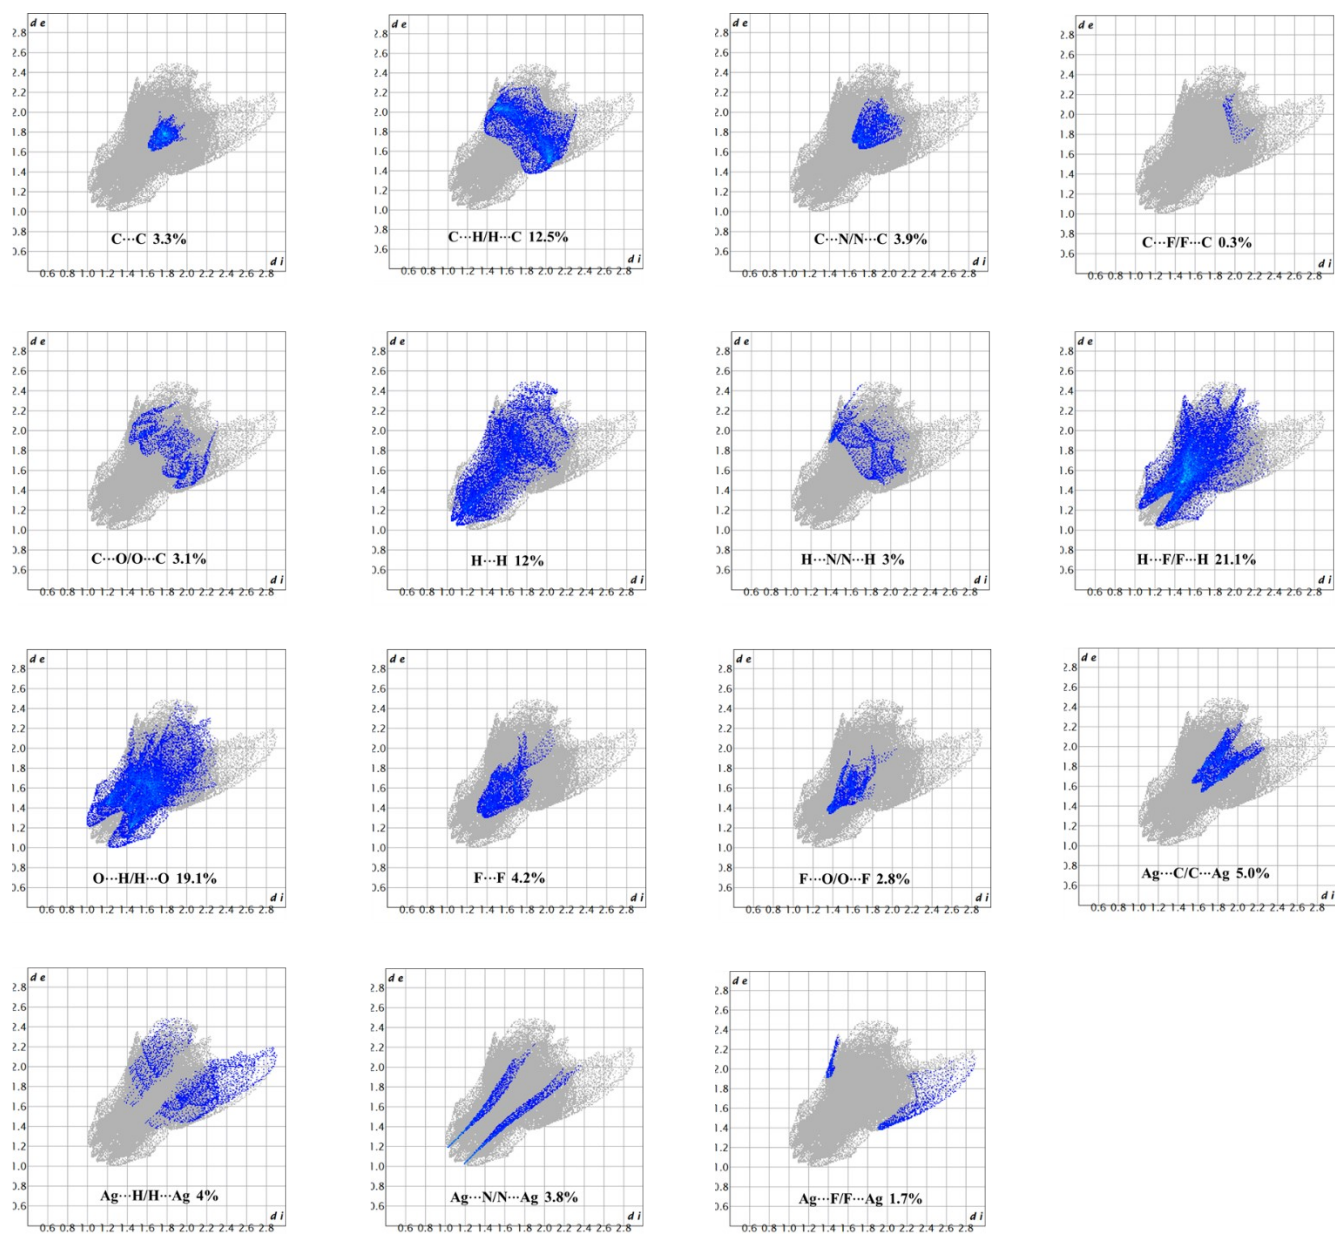

Fig. S37: Full fingerprint plot is resolved for various types of interactions and the percentage of their contributions to the total Hirshfeld surface area are presented for 4.



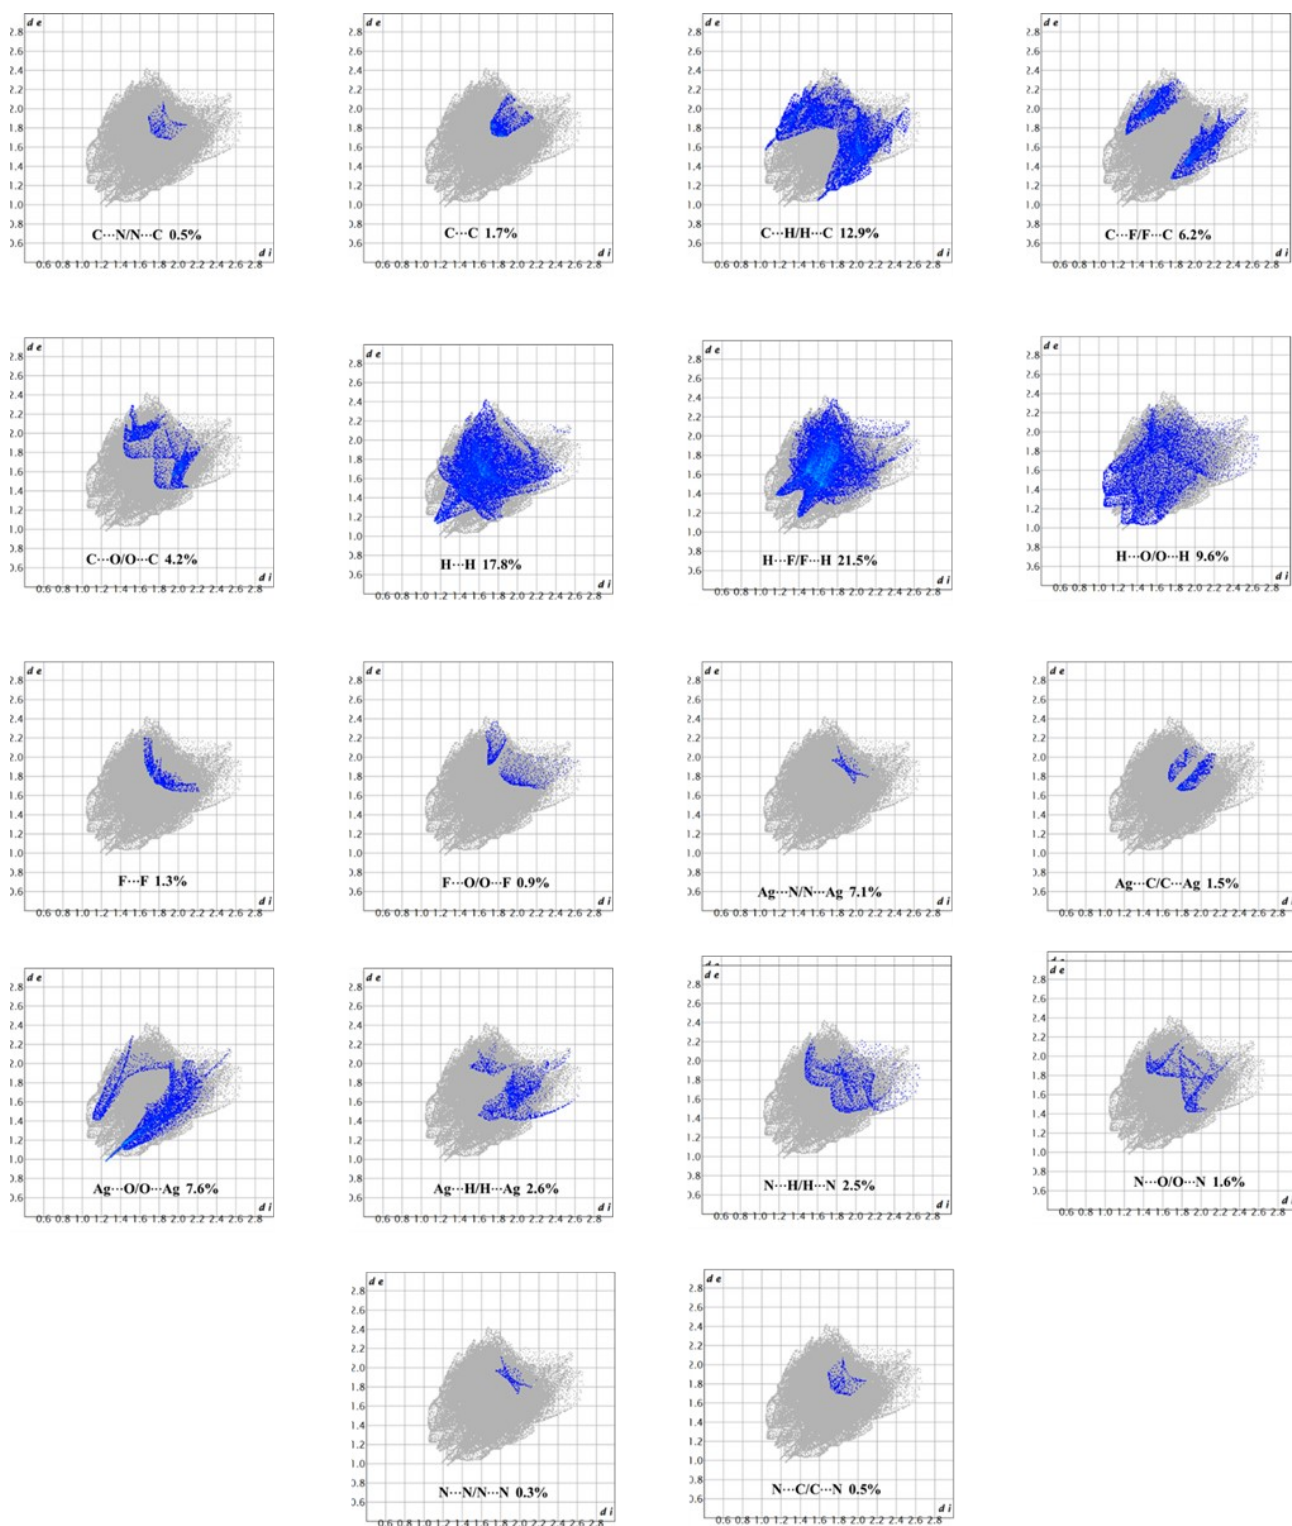

Fig. S38: Full fingerprint plot is resolved for various types of interactions and the percentage of their contributions to the total Hirshfeld surface area are presented for **5**.
